# Supplementary material for: Leveraging the 3-Chloro-4-fluorophenyl Motif to Identify Inhibitors of Tyrosinase from Agaricus bisporus
Source: MDPI journal article supplement (doi:10.3390/ijms24097944), 2023-04-27
Supplement: s1 [file s1]

# Leveraging the 3-Chloro-4-fluorophenyl Motif to Identify Inhibitors of Tyrosinase from *Agaricus bisporus*

Salvatore Mirabile <sup>1,2</sup>, Laura Ielo <sup>3</sup>, Lisa Lombardo <sup>1</sup>, Federico Ricci <sup>1</sup>, Rosaria Gitto <sup>1</sup>, Maria Paola Germanò <sup>1</sup>, Vittorio Pace <sup>3,\*</sup> and Laura De Luca <sup>1,\*</sup>

<sup>1</sup> Department of Chemical, Biological, Pharmaceutical and Environmental Sciences, University of Messina, Viale F. Stagno D'Alcontres 31, I-98166 Messina, Italy; salvatore.mirabile@unime.it (S.M.); lisa.lombardo@studenti.unime.it (L.L.); federico.ricci@unime.it (F.R.); rosaria.gitto@unime.it (R.G.); mariapaola.germano@unime.it (M.P.G.)

<sup>2</sup> Foundation Prof. Antonio Imbesi, University of Messina, Piazza Pugliatti 1, I-98122 Messina, Italy

<sup>3</sup> Department of Chemistry, University of Turin, Via P. Giuria 7, 10125 Torino, Italy; laura.ielo@unito.it

\* Correspondence: vittorio.pace@unito.it (V.P.); laura.deluca@unime.it (L.D.L.); Tel. +39-011-6707994 (V.P.); 39-090-6766410 (L.D.L.)

## Content:

**Figures S1-S38:** <sup>1</sup>H-NMR and <sup>13</sup>C-NMR spectra of synthesized compounds.....S2

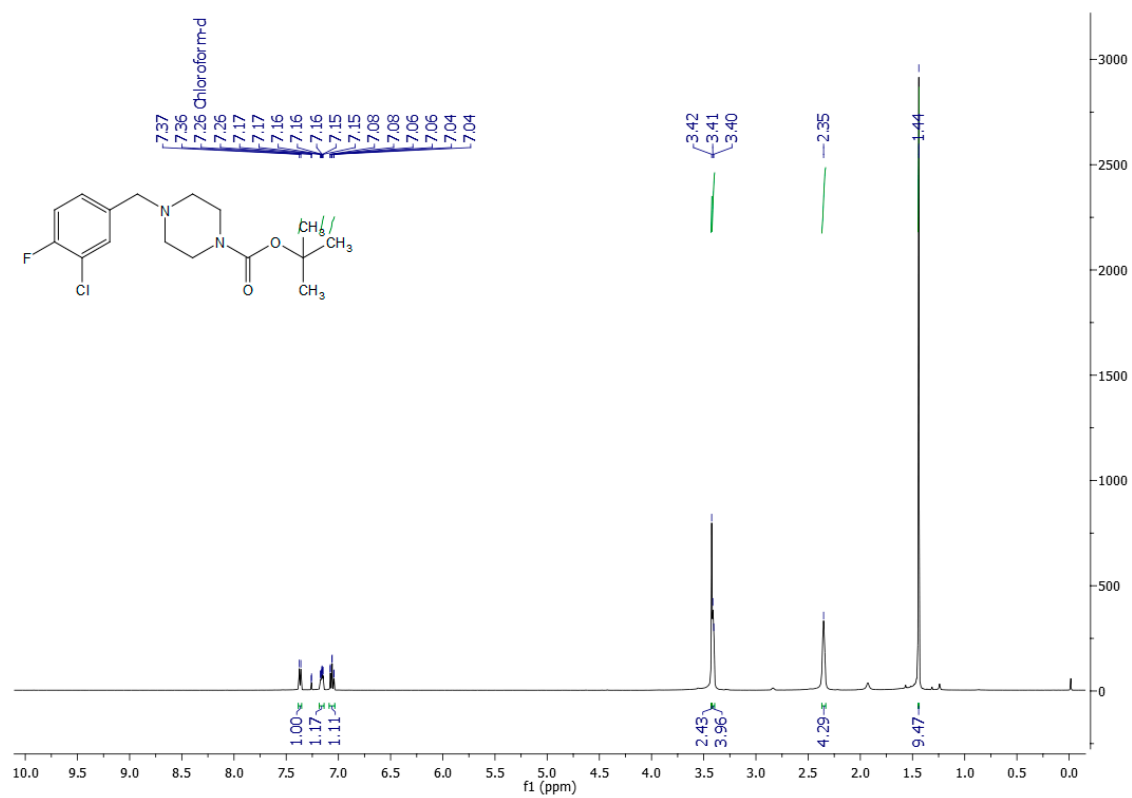

**Figure S1:** <sup>1</sup>H-NMR (CDCl<sub>3</sub>) spectrum of *tert*-Butyl 4-[(3-chloro-4-fluorophenyl)methyl]piperazine-1-carboxylate

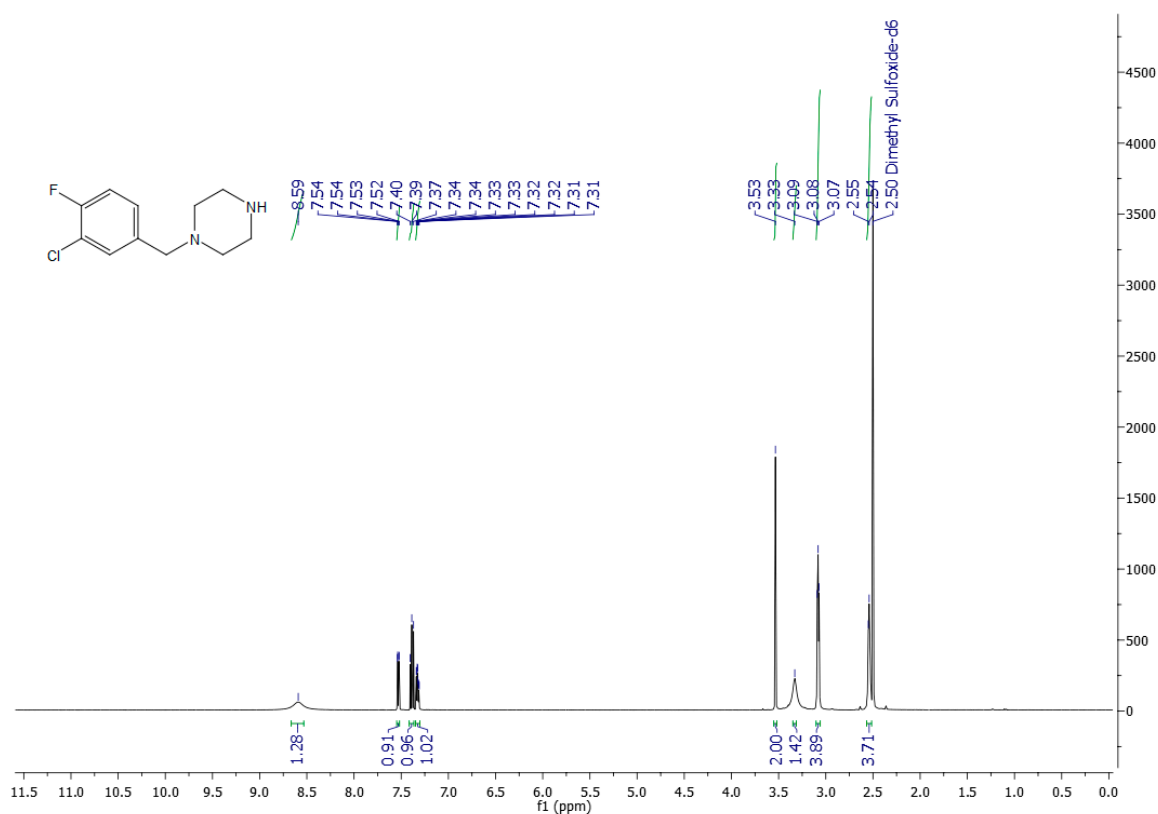

**Figure S2:** <sup>1</sup>H-NMR (DMSO-d<sub>6</sub>) spectrum of 1-[(3-chloro-4-fluorophenyl)methyl]piperazine (**6**)

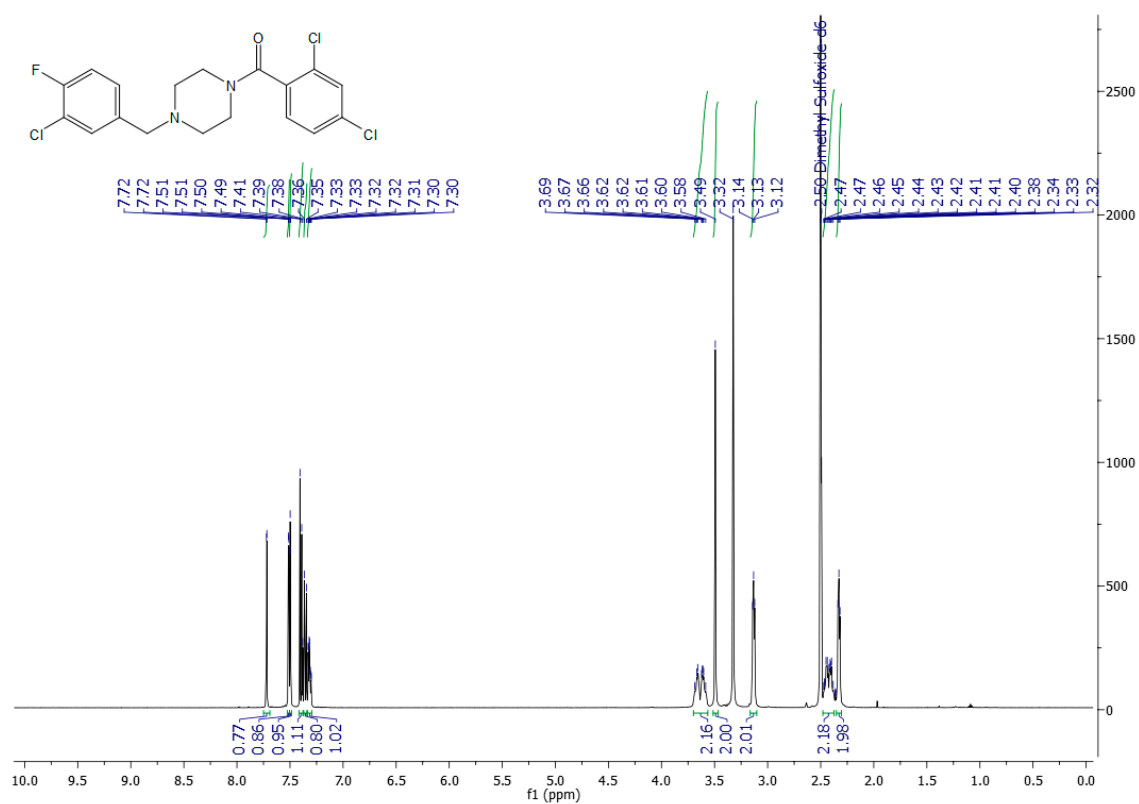

**Figure S3:** <sup>1</sup>H-NMR (DMSO-d<sub>6</sub>) spectrum of (4-(3-Chloro-4-fluorobenzyl)piperazin-1-yl)(2,4-dichlorophenyl)methanone (**1d**)

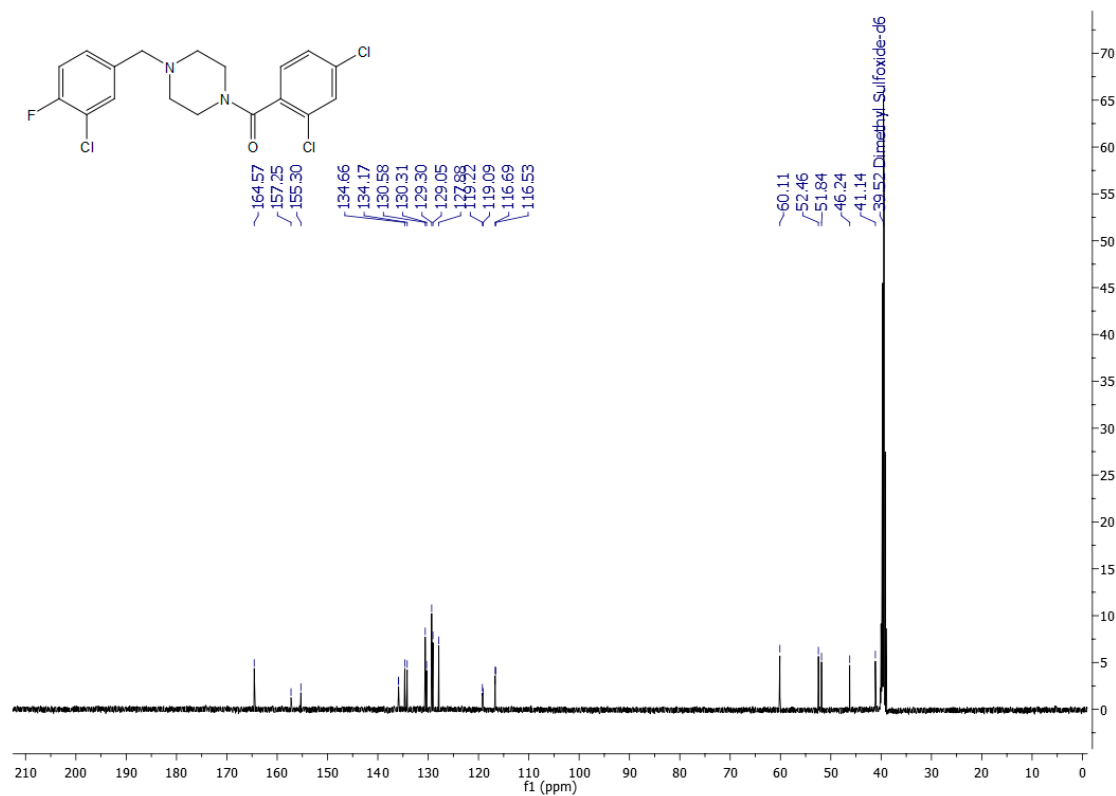

**Figure S4:** <sup>13</sup>C-NMR (DMSO-d<sub>6</sub>) spectrum of (4-(3-Chloro-4-fluorobenzyl)piperazin-1-yl)(2,4-dichlorophenyl)methanone (**1d**)

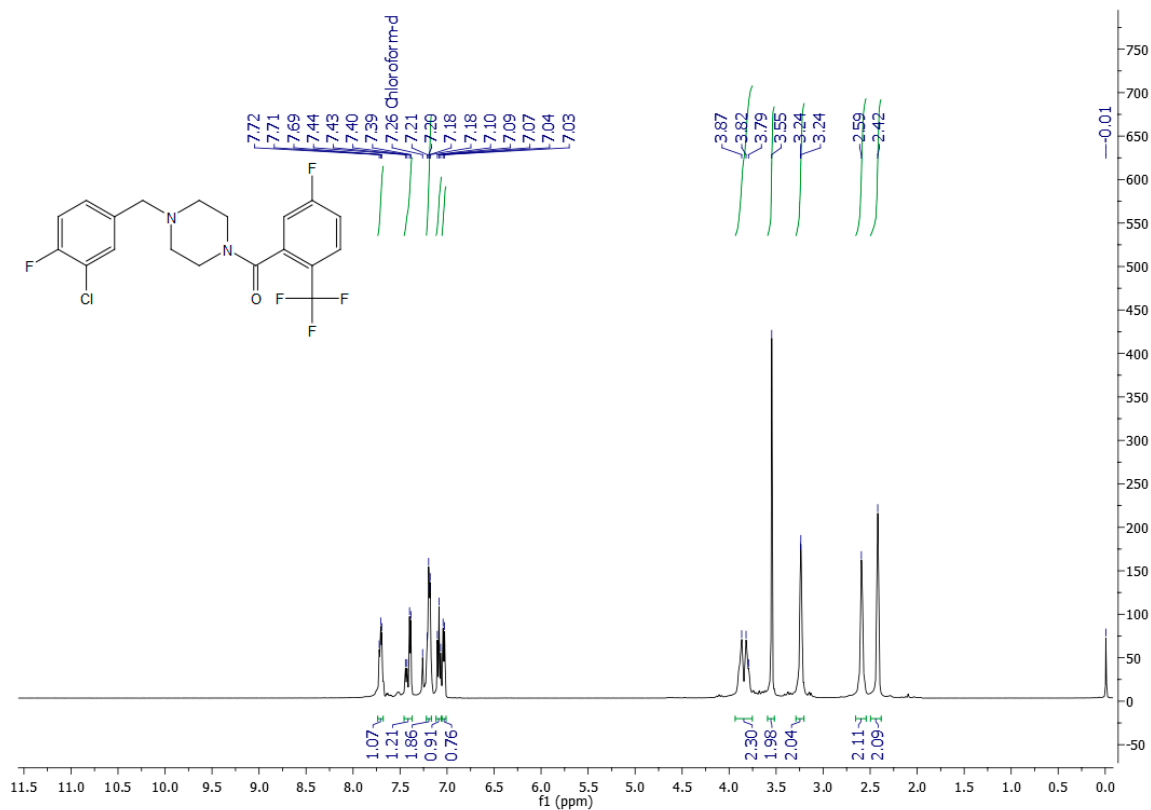

**Figure S5:** <sup>1</sup>H-NMR (CDCl<sub>3</sub>) spectrum of (4-(3-Chloro-4-fluorobenzyl)piperazin-1-yl)(5-fluoro-2-(trifluoromethyl)phenyl)methanone (**1e**)

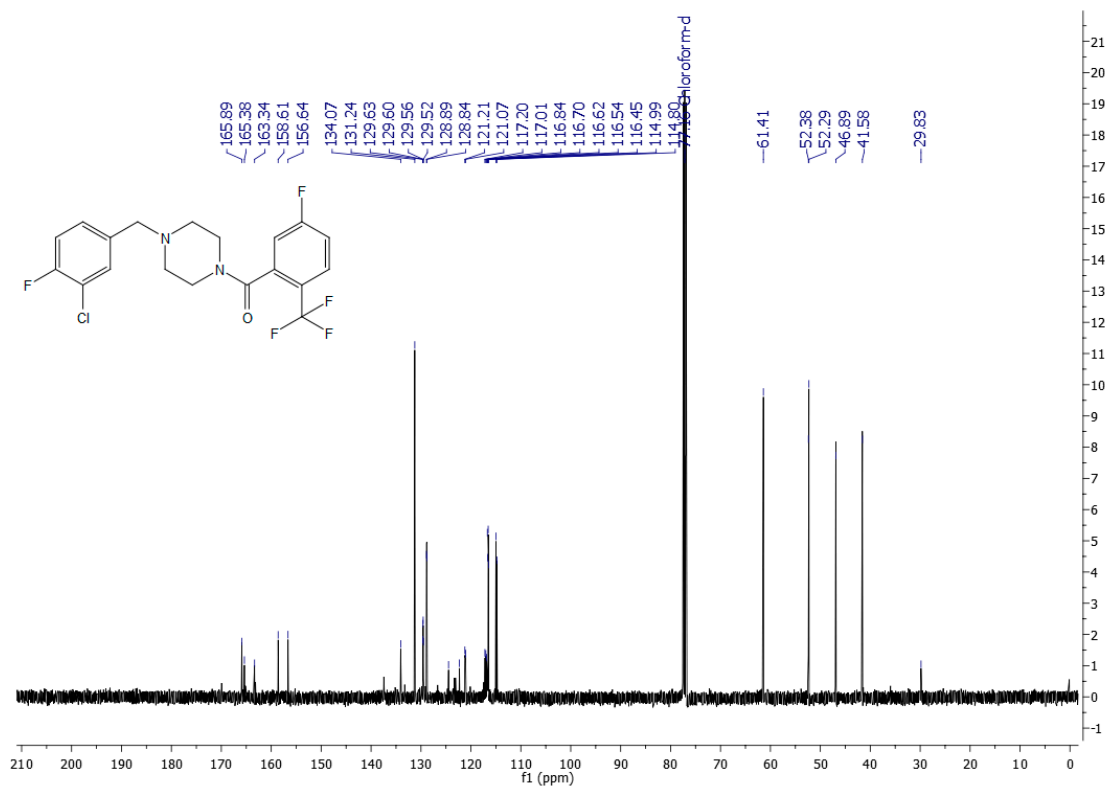

**Figure S6:**  $^{13}\text{C}$ -NMR ( $\text{CDCl}_3$ ) spectrum of (4-(3-Chloro-4-fluorobenzyl)piperazin-1-yl)(5-fluoro-2-(trifluoromethyl)phenyl)methanone (**1e**)

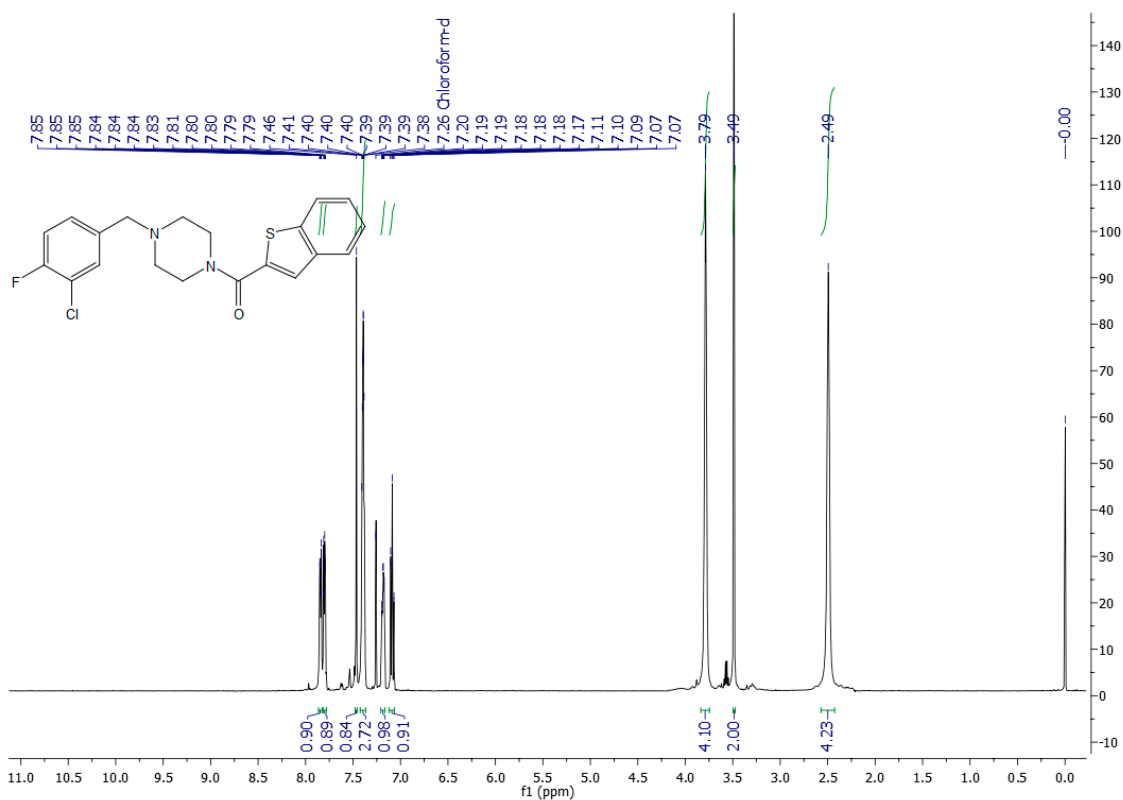

**Figure S7:**  $^1\text{H}$ -NMR ( $\text{CDCl}_3$ ) spectrum of Benzo[*b*]thiophen-2-yl(4-(3-chloro-4-fluorobenzyl)piperazin-1-yl)methanone (**1f**)

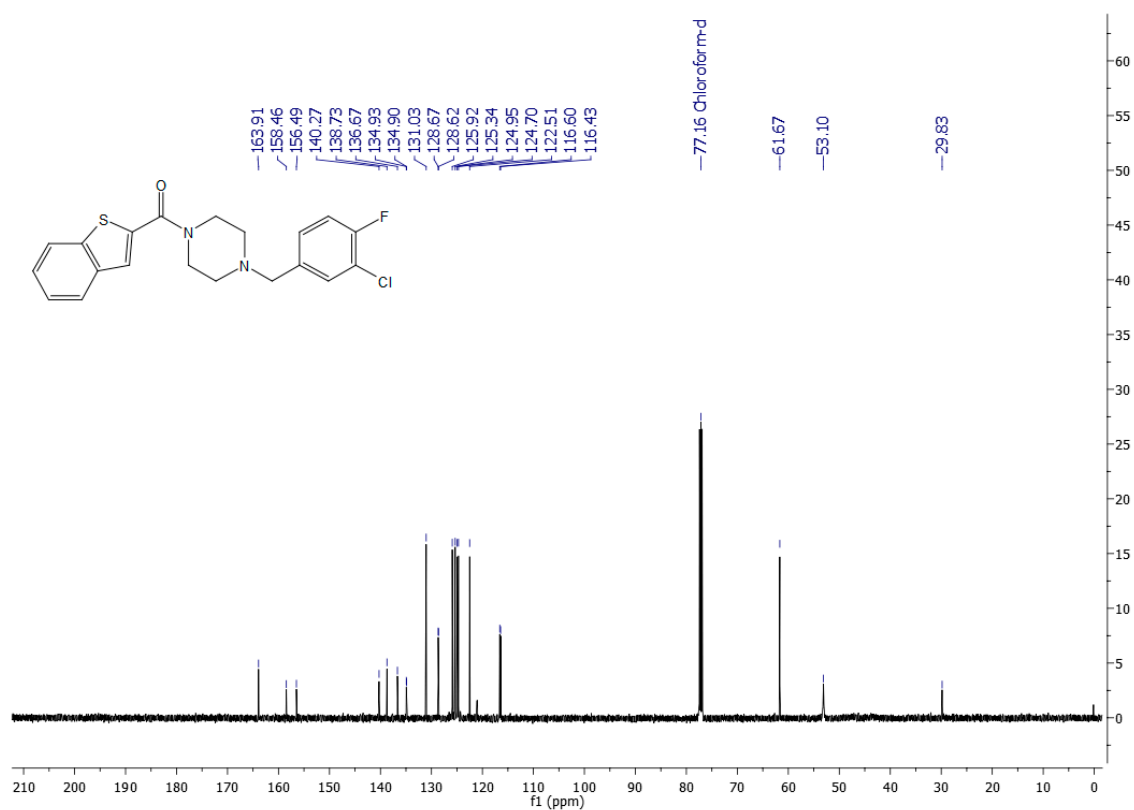

**Figure S8:** <sup>13</sup>C-NMR (CDCl<sub>3</sub>) spectrum of Benzo[b]thiophen-2-yl(4-(3-chloro-4-fluorobenzyl)piperazin-1-yl)methanone (1f)

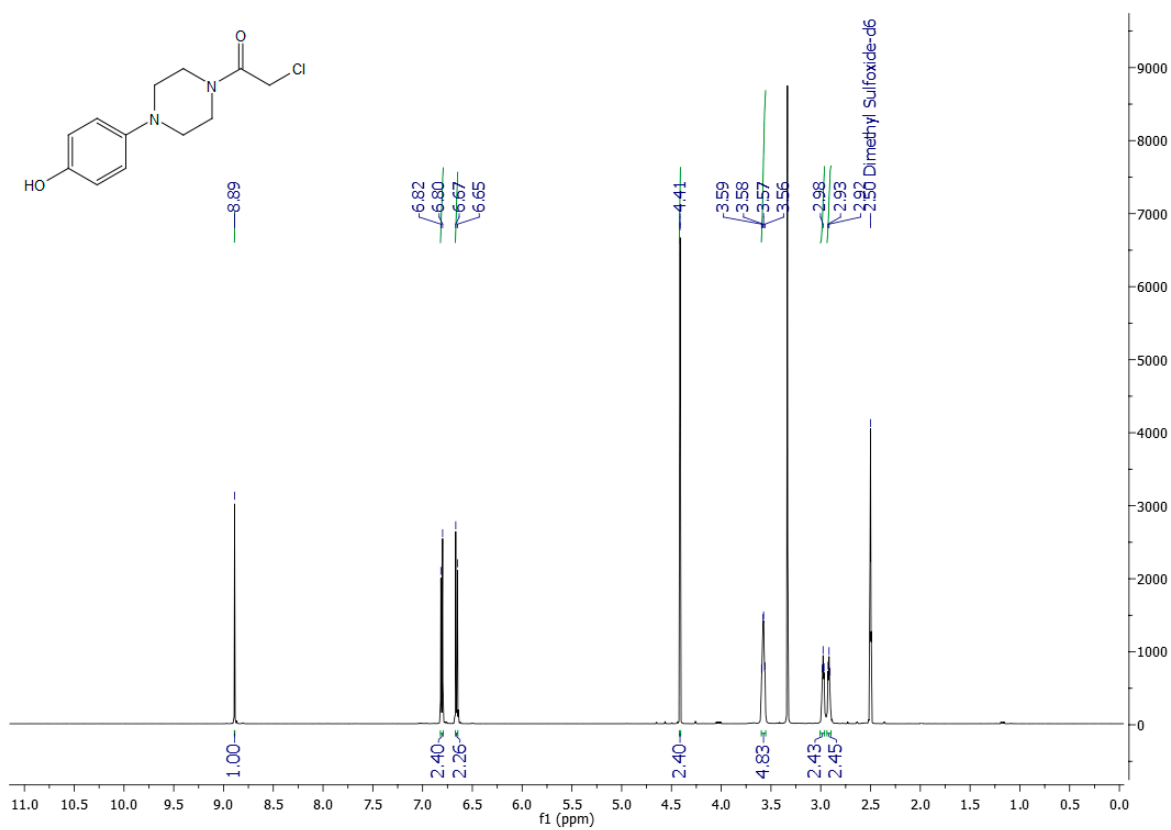

**Figure S9:**  $^1\text{H}$ -NMR ( $\text{DMSO-}d_6$ ) spectrum of 2-Chloro-1-[4-(4-hydroxyphenyl)piperazin-1-yl]ethanone (**8a**)

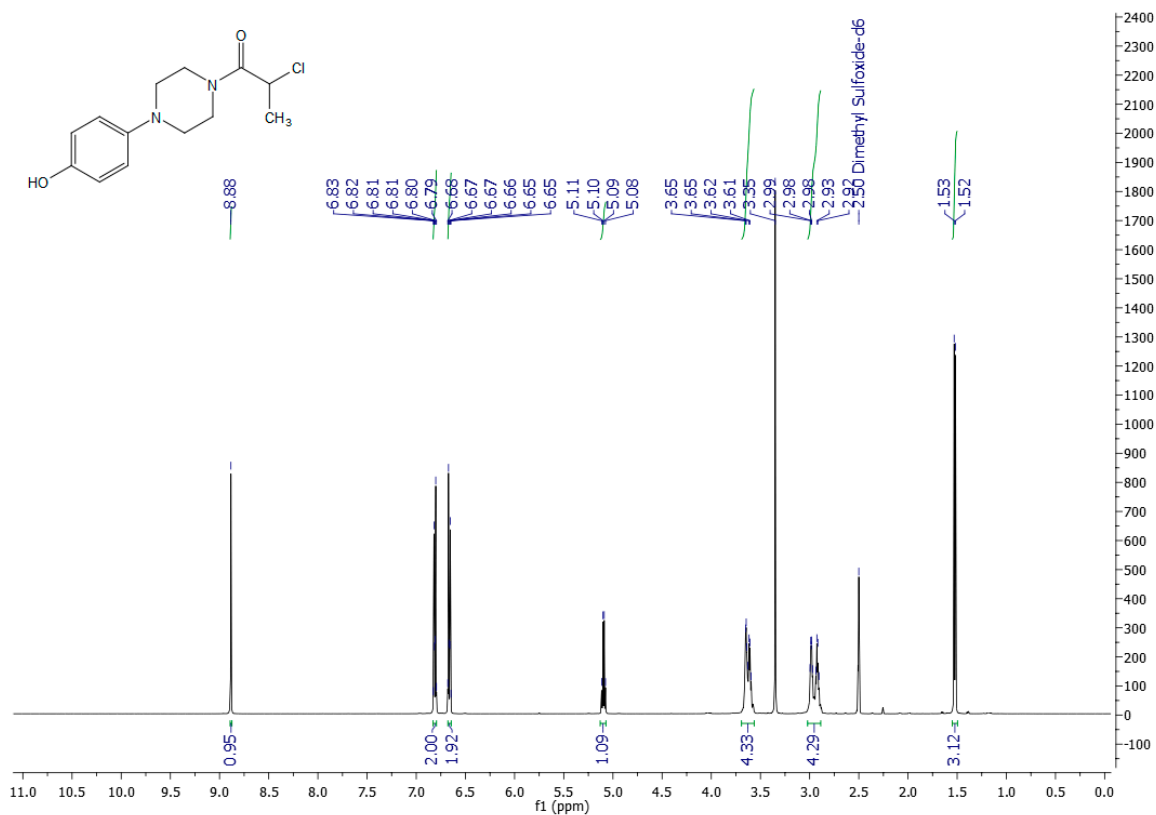

**Figure S10:**  $^1\text{H}$ -NMR ( $\text{DMSO-}d_6$ ) spectrum of 2-Chloro-1-(4-(4-hydroxyphenyl)piperazin-1-yl)propan-1-one (**8b**)

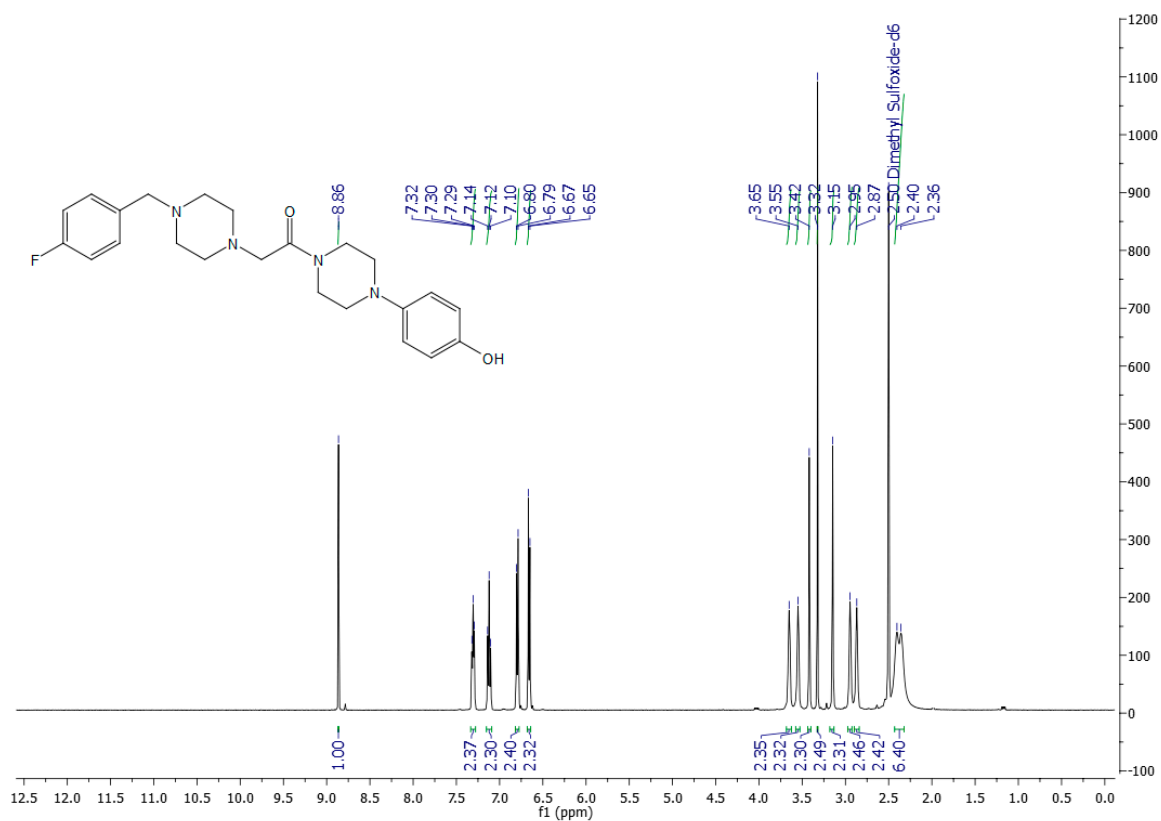

**Figure S11:**  $^1\text{H}$ -NMR (DMSO- $d_6$ ) spectrum of 2-(4-(4-Fluorobenzyl)piperazin-1-yl)-1-(4-(4-hydroxyphenyl)piperazin-1-yl)ethanone (**2b**)

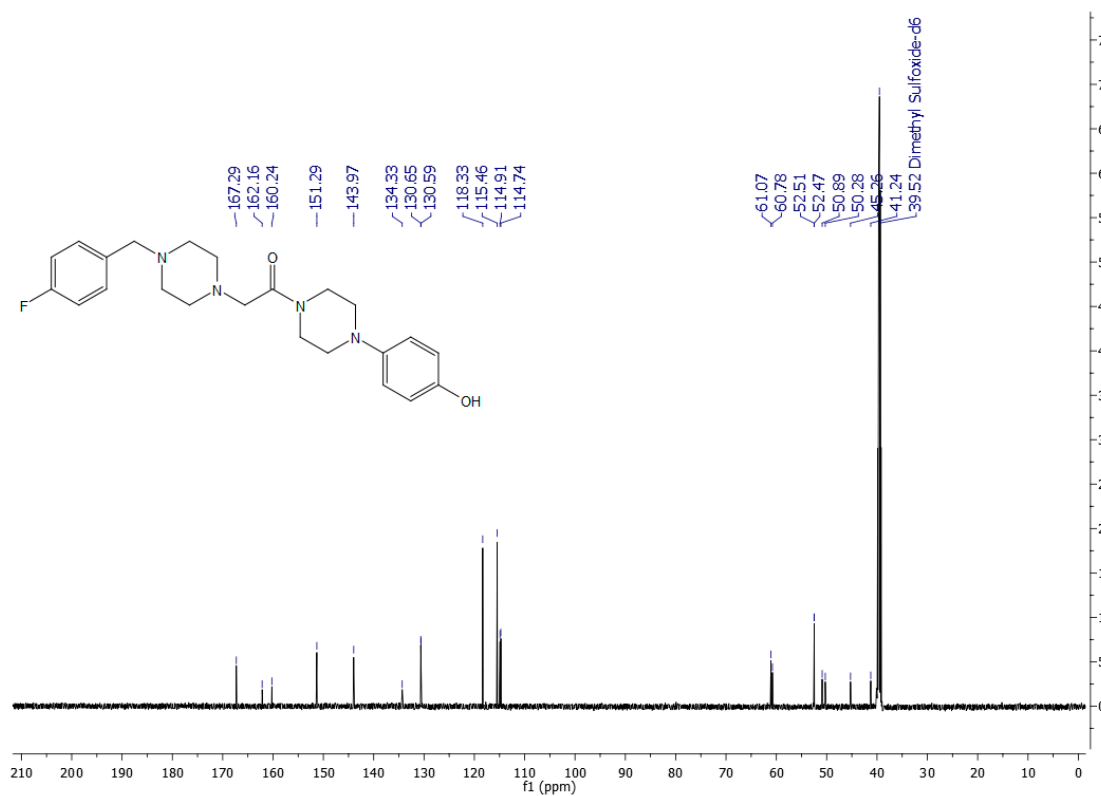



**Figure S12:**  $^{13}\text{C}$ -NMR ( $\text{DMSO-}d_6$ ) spectrum of 2-(4-(4-Fluorobenzyl)piperazin-1-yl)-1-(4-(4-hydroxyphenyl)piperazin-1-yl)ethanone (**2b**)

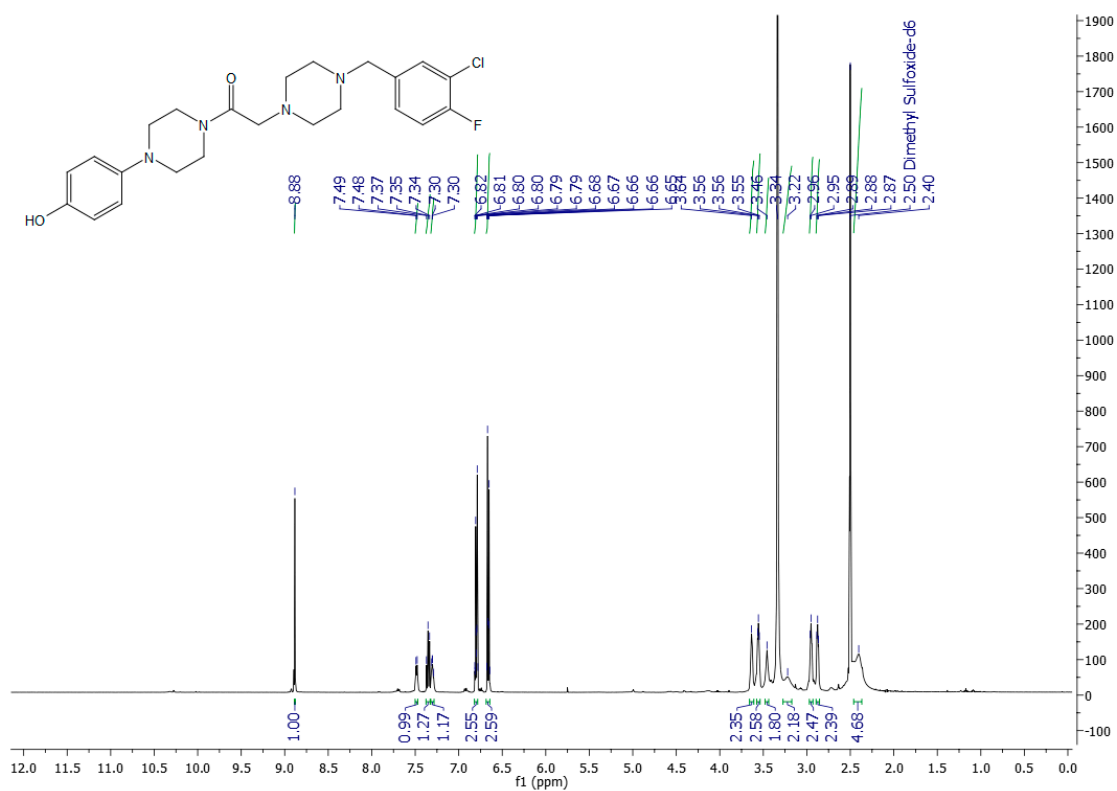

**Figure S13:**  $^1\text{H}$ -NMR ( $\text{DMSO-}d_6$ ) spectrum of 2-(4-(3-Chloro-4-fluorobenzyl)piperazin-1-yl)-1-(4-(4-hydroxyphenyl)piperazin-1-yl)ethanone (**2c**)

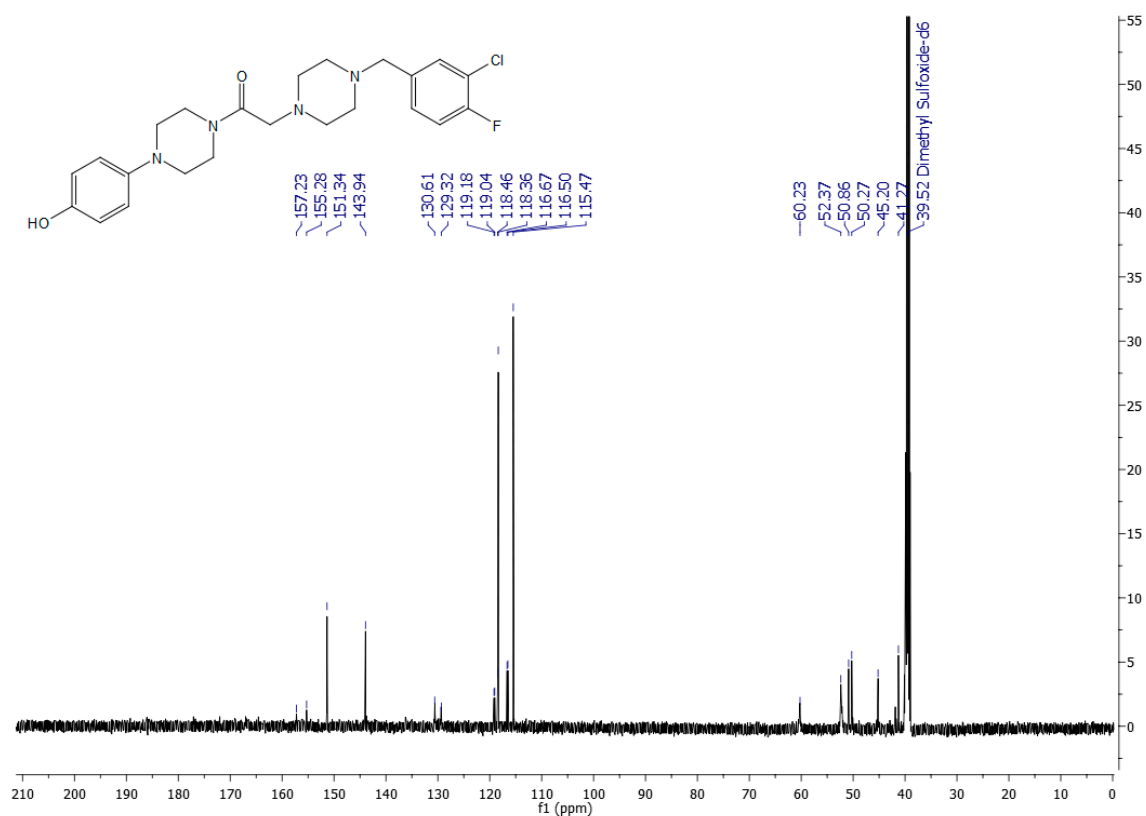

**Figure S14:**  $^{13}\text{C}$ -NMR (DMSO- $d_6$ ) spectrum of 2-(4-(3-Chloro-4-fluorobenzyl)piperazin-1-yl)-1-(4-(4-hydroxyphenyl)piperazin-1-yl)ethanone (2c)

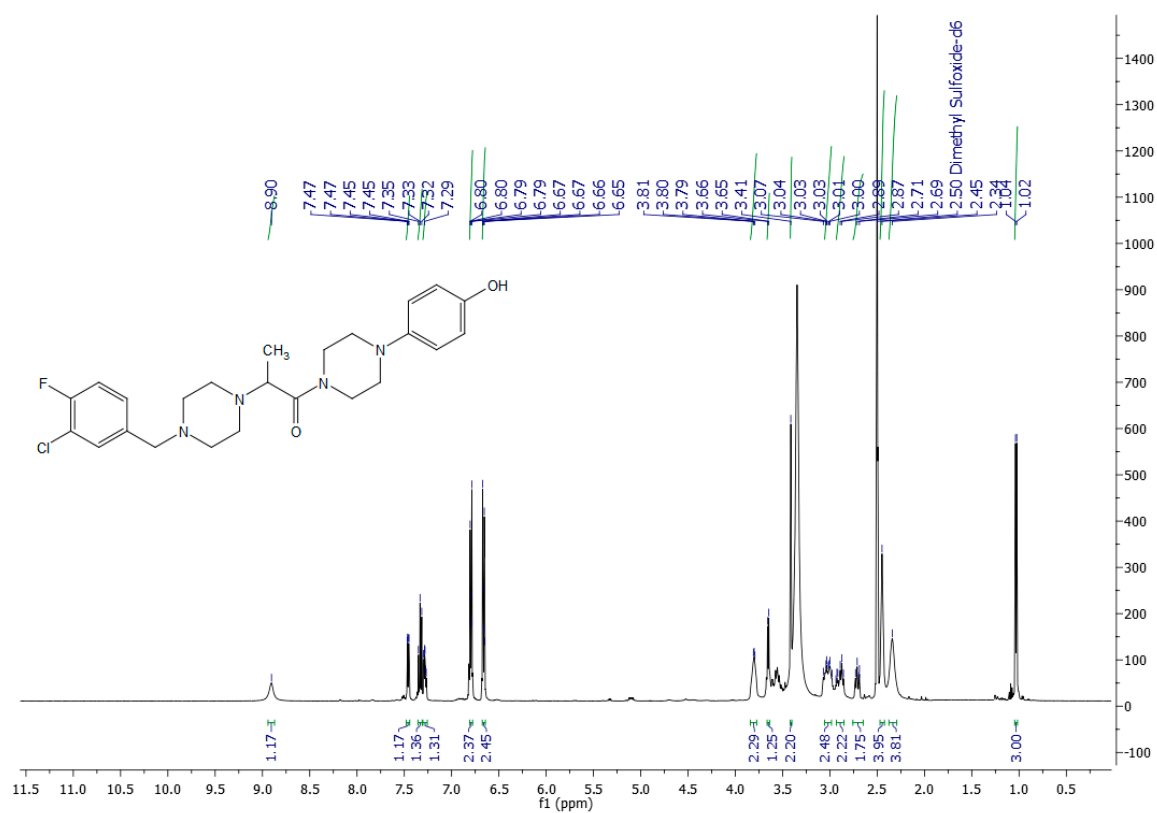

**Figure S15:**  $^1\text{H}$ -NMR ( $\text{DMSO-}d_6$ ) spectrum of 2-(4-(3-Chloro-4-fluorobenzyl)piperazin-1-yl)-1-(4-(4-hydroxyphenyl)piperazin-1-yl)propan-1-one (**2d**)

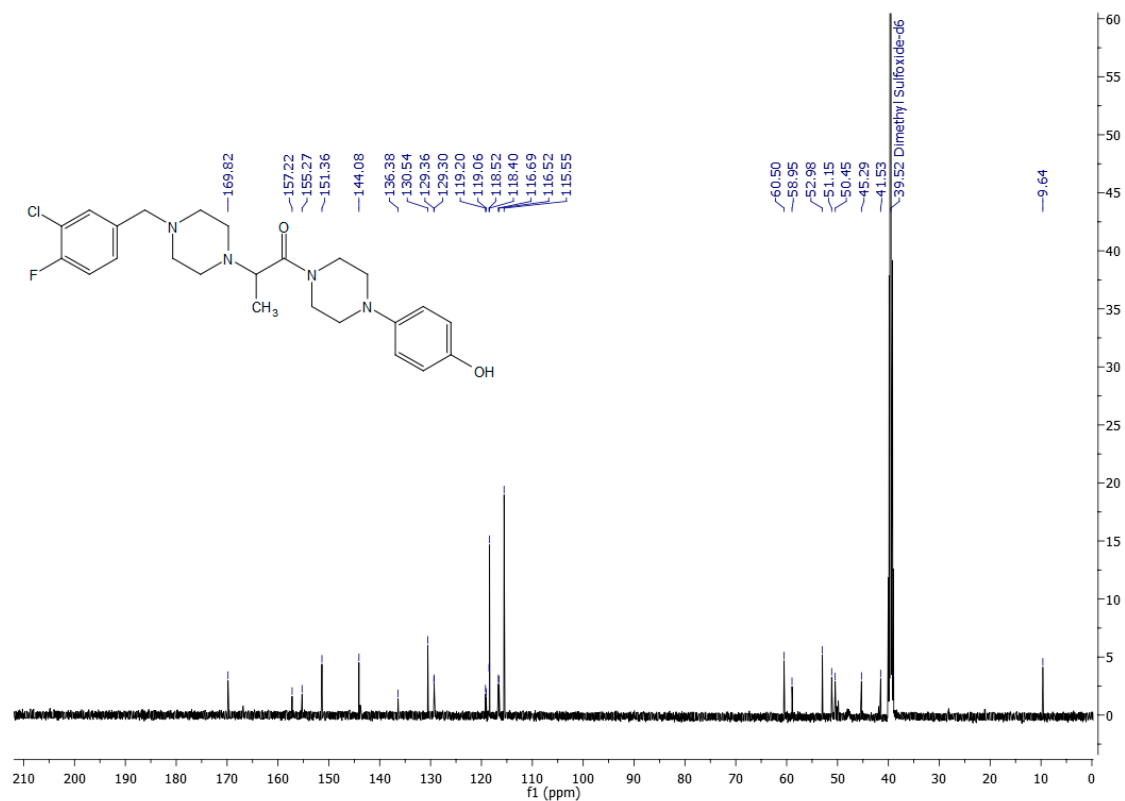

**Figure S16:**  $^{13}\text{C}$ -NMR ( $\text{DMSO-}d_6$ ) spectrum of 2-(4-(3-Chloro-4-fluorobenzyl)piperazin-1-yl)-1-(4-(4-hydroxyphenyl)piperazin-1-yl)propan-1-one (**2d**)

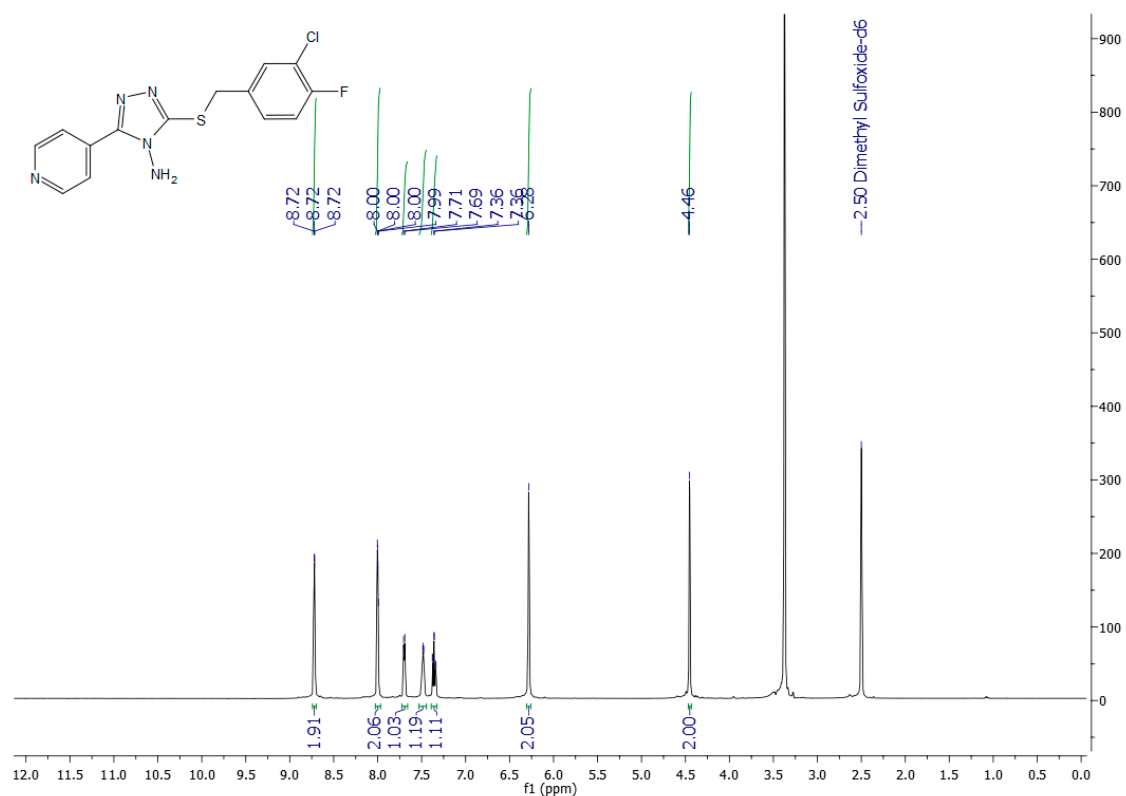

**Figure S17:** <sup>1</sup>H-NMR (DMSO-*d*<sub>6</sub>) spectrum of 3-(3-Chloro-4-fluorobenzylthio)-5-(pyridin-4-yl)-4H-1,2,4-triazol-4-amine (**3b**)

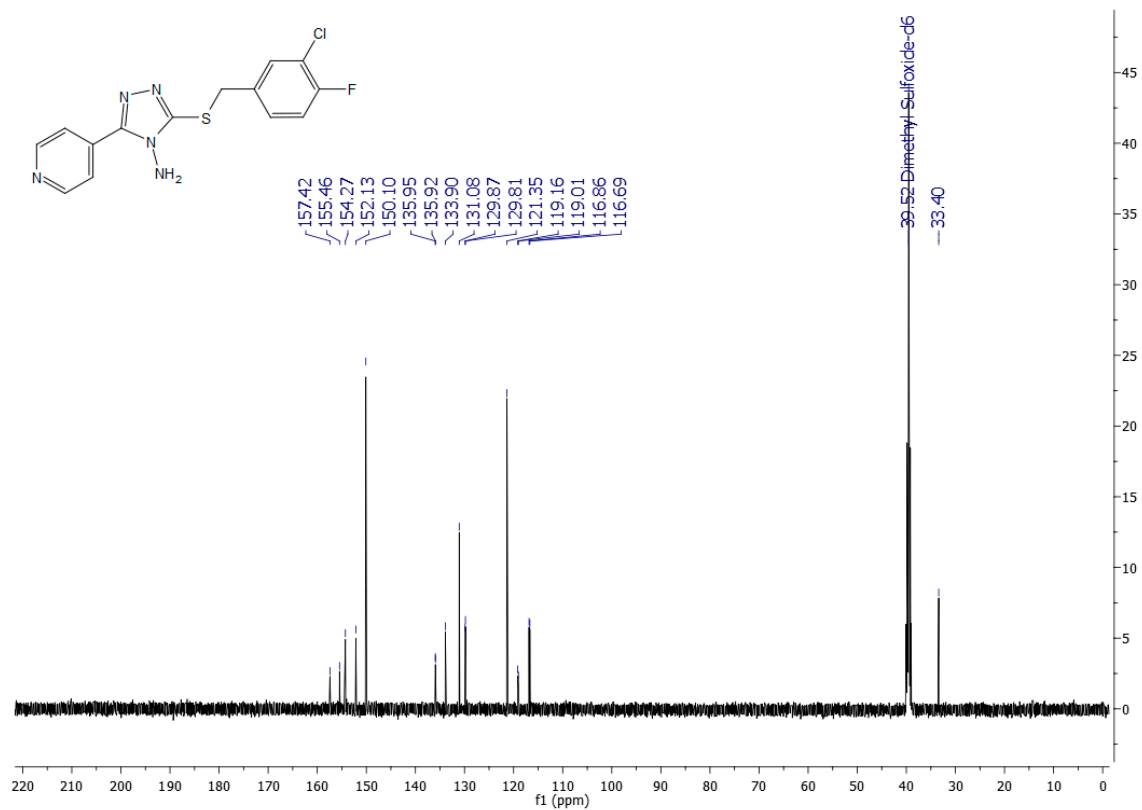

**Figure S18:**  $^{13}\text{C}$ -NMR ( $\text{DMSO-}d_6$ ) spectrum of 3-(3-Chloro-4-fluorobenzylthio)-5-(pyridin-4-yl)-4H-1,2,4-triazol-4-amine (**3b**)

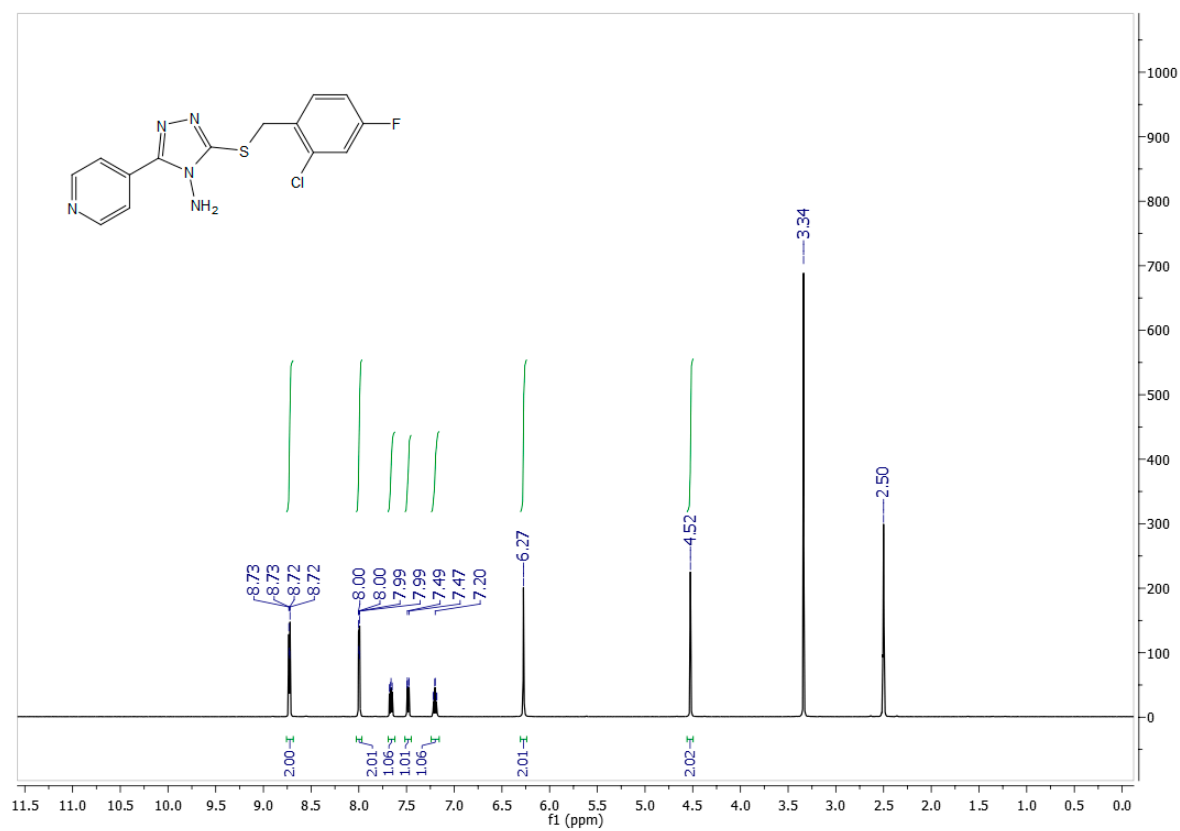

**Figure S19:**  $^1\text{H}$ -NMR ( $\text{DMSO-}d_6$ ) spectrum of 3-((2-Chloro-4-fluorobenzyl)thio)-5-(pyridin-4-yl)-4H-1,2,4-triazol-4-amine (**3c**)

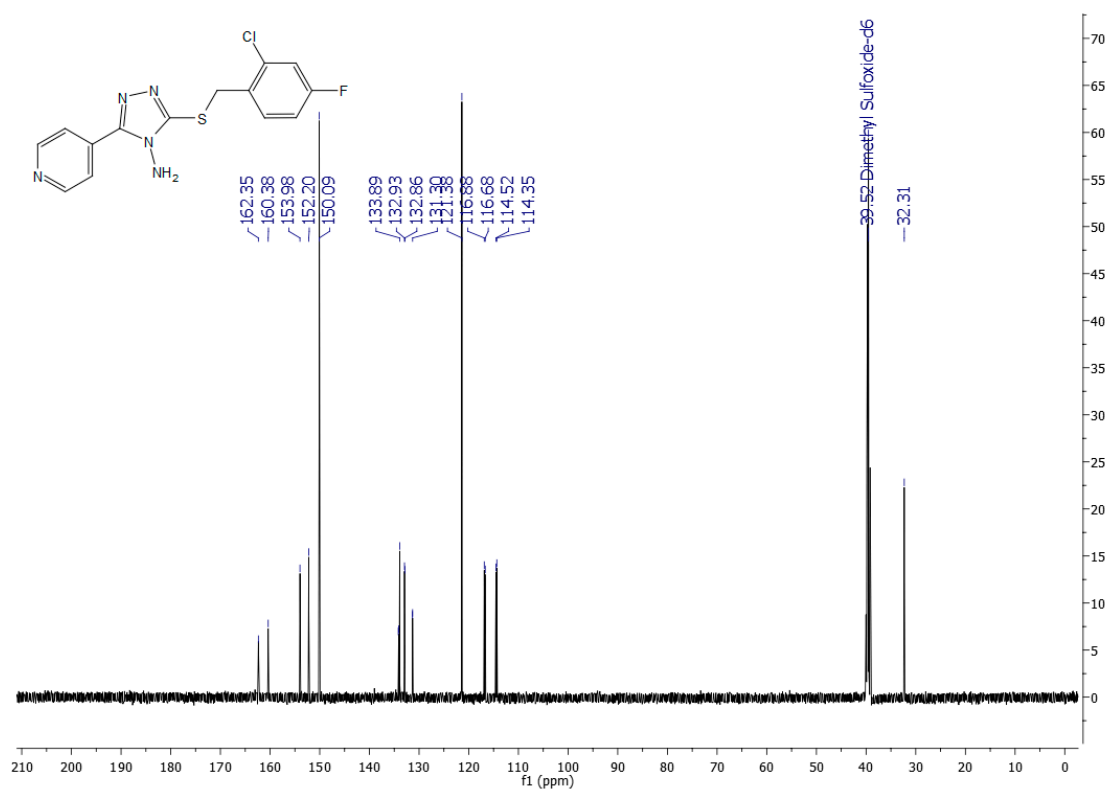

**Figure S20:** <sup>13</sup>C-NMR (DMSO-*d*<sub>6</sub>) spectrum of 3-((2-Chloro-4-fluorobenzyl)thio)-5-(pyridin-4-yl)-4H-1,2,4-triazol-4-amine (3c)

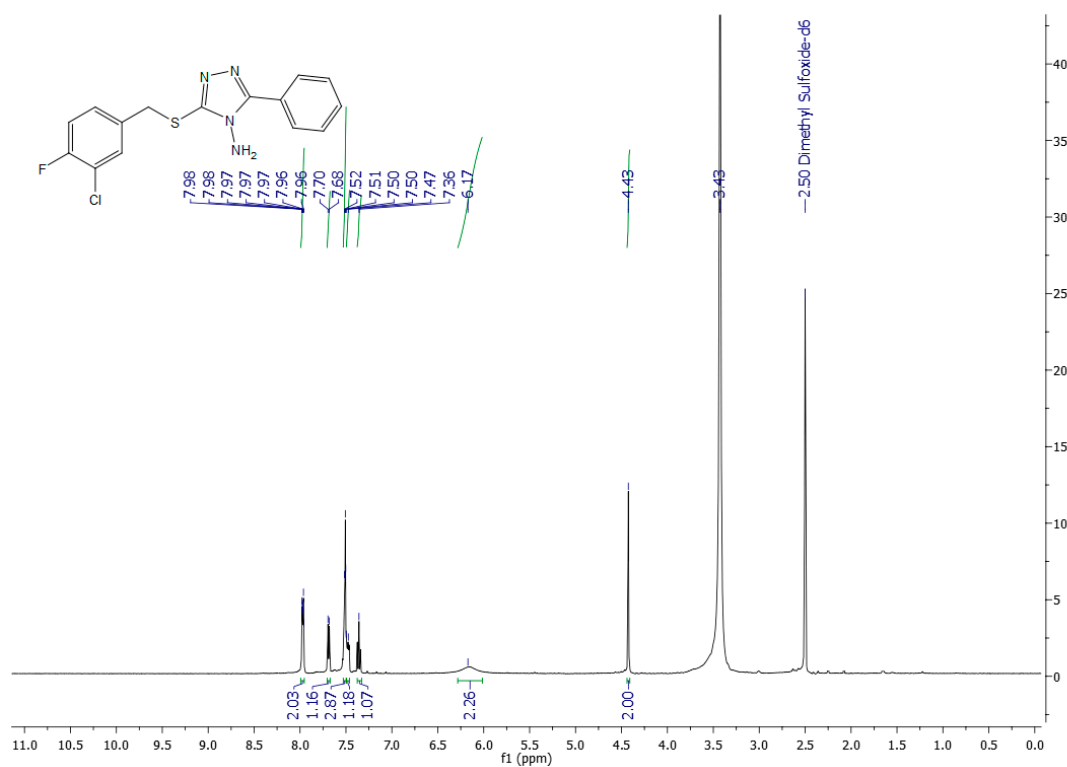

**Figure S21:** <sup>1</sup>H-NMR (DMSO-*d*<sub>6</sub>) spectrum of 3-(3-Chloro-4-fluorobenzylthio)-5-phenyl-4H-1,2,4-triazol-4-amine (3d)

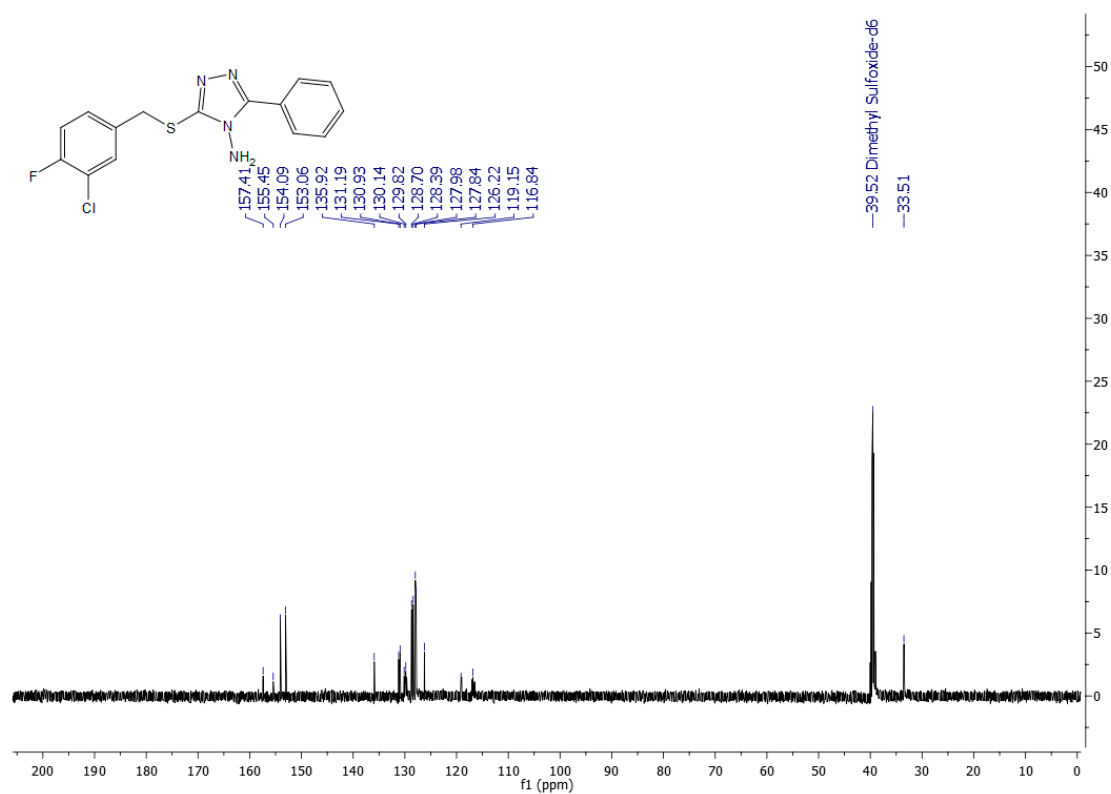

**Figure S22:** <sup>13</sup>C-NMR (DMSO-*d*<sub>6</sub>) spectrum of 3-(3-Chloro-4-fluorobenzylthio)-5-phenyl-4H-1,2,4-triazol-4-amine (3d)

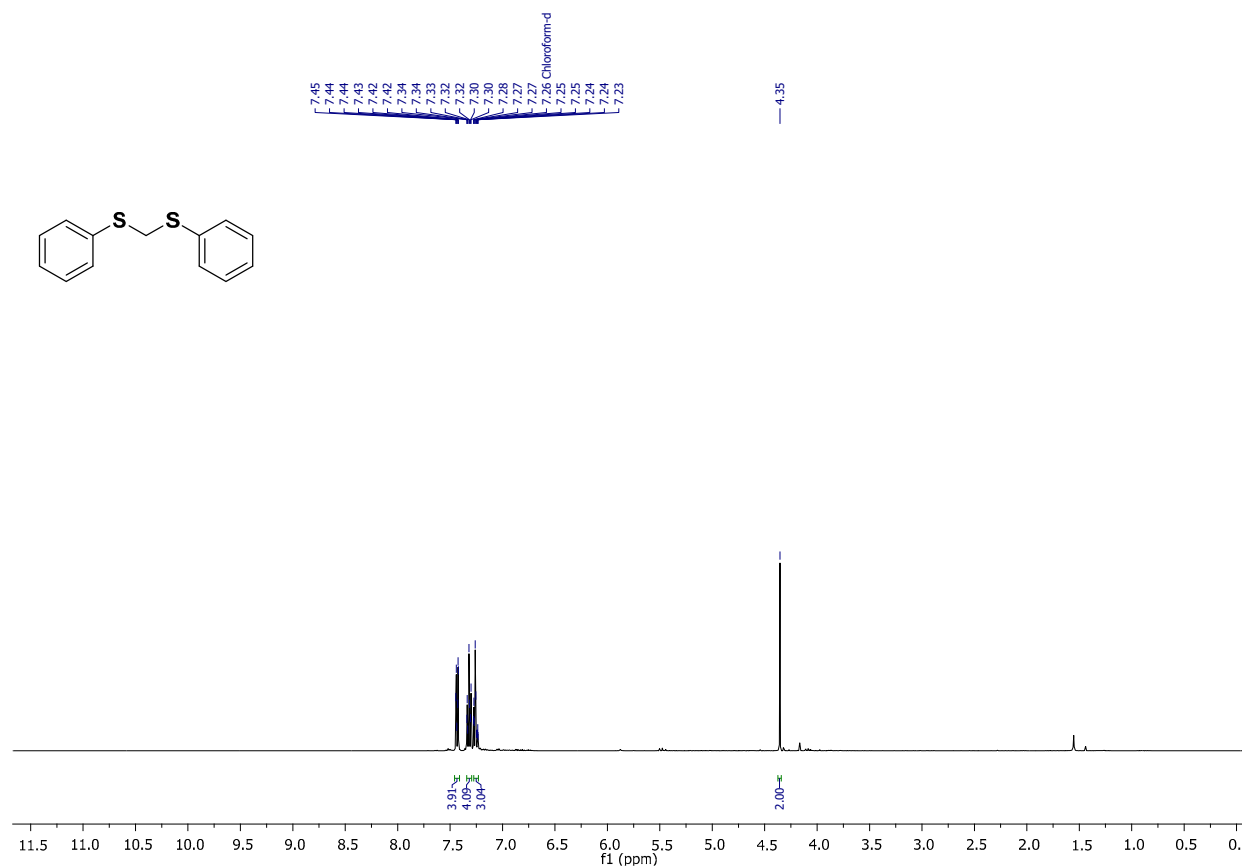

**Figure S23:**  $^1\text{H}$ -NMR ( $\text{CDCl}_3$ ) spectrum of phenylsulfanylmethylsulfanylbenzene (**4b**)

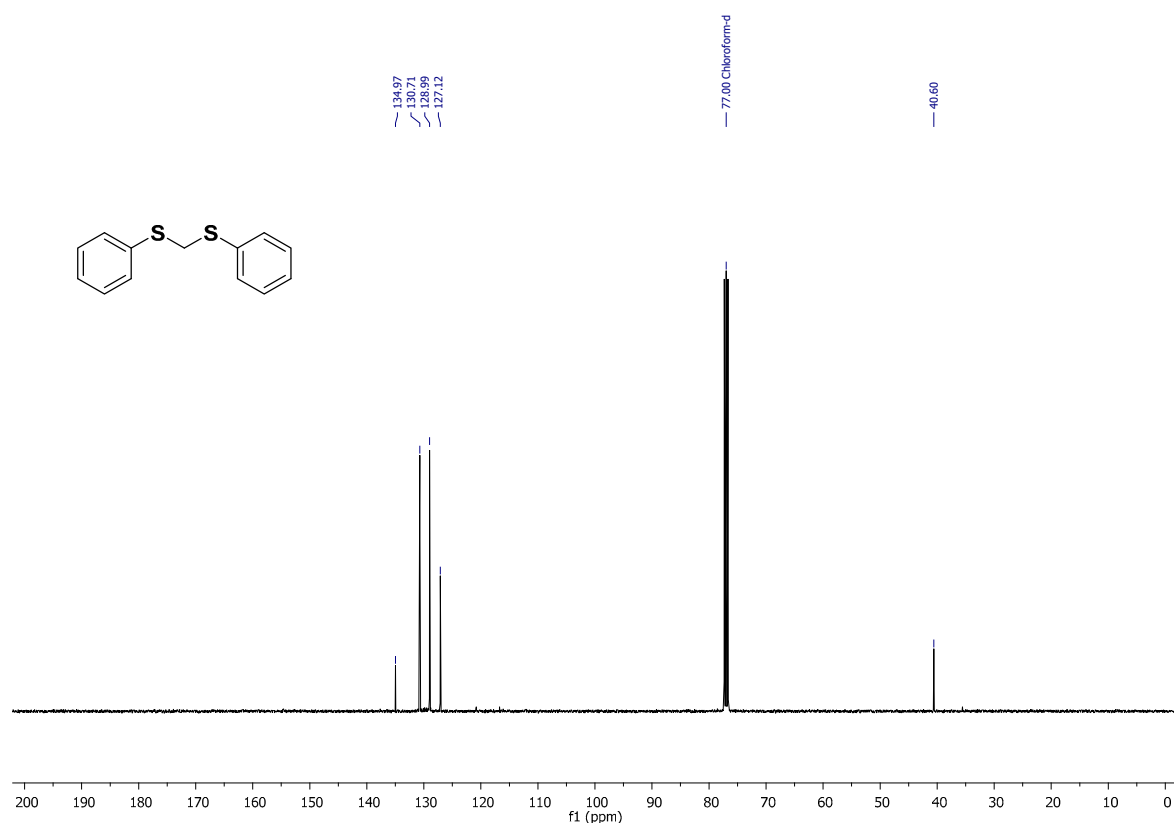

**Figure S24:**  $^{13}\text{C}$ -NMR ( $\text{CDCl}_3$ ) spectrum of phenylsulfanylmethylsulfanylbenzene (**4b**)

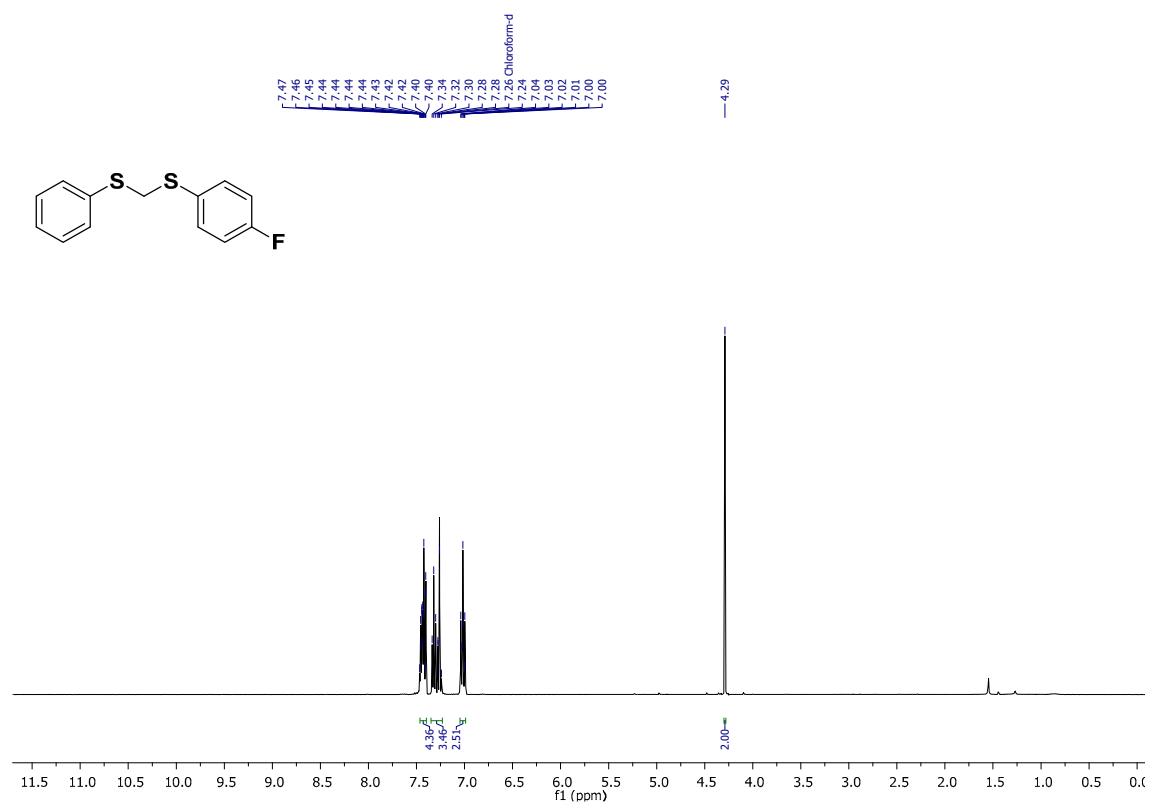



**Figure S25:**  $^1\text{H}$ -NMR ( $\text{CDCl}_3$ ) spectrum of 1-fluoro-4-[(phenylsulfanyl)methyl]sulfanylbenzene (4c)

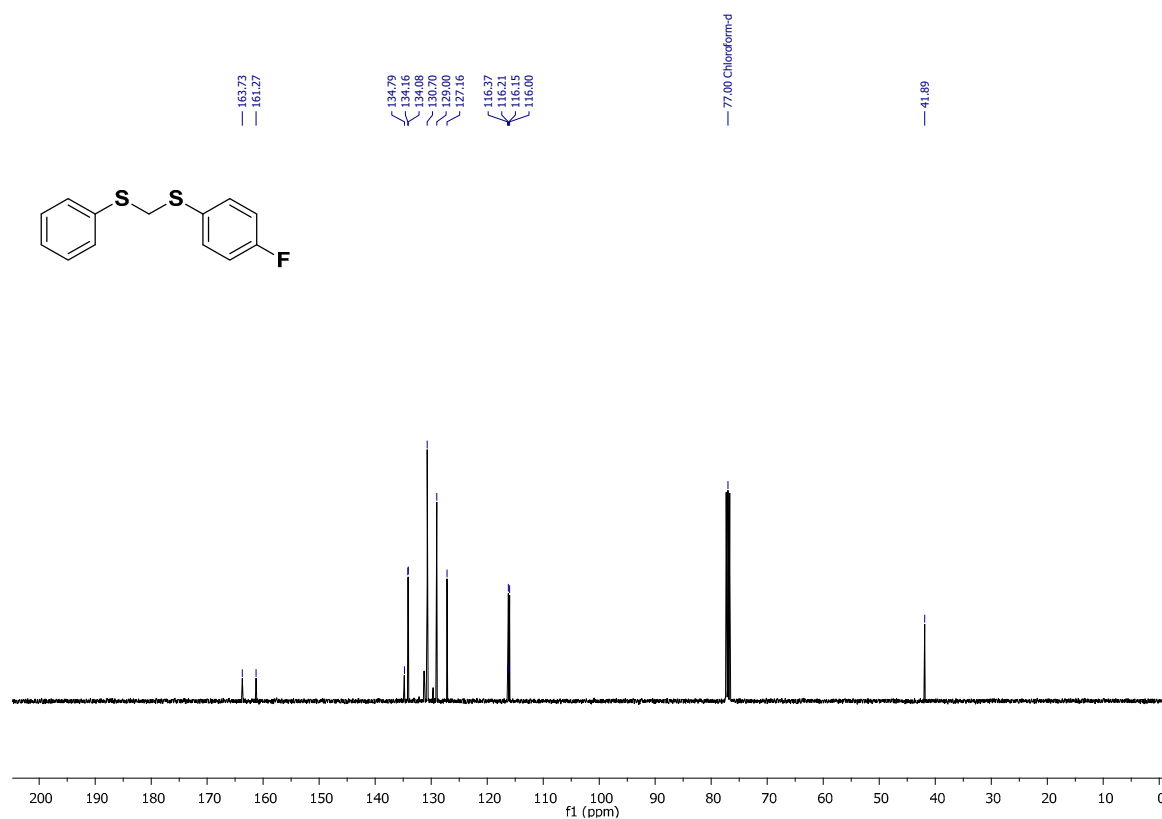

**Figure S26:**  $^{13}\text{C}$ -NMR ( $\text{CDCl}_3$ ) spectrum of 1-Fluoro-4-[(phenylsulfanyl)methyl]sulfanylbenzene (4c)

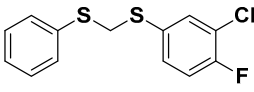c1ccccc1SSc2ccc(F)c(Cl)c2

<sup>13</sup>C NMR spectrum (CDCl<sub>3</sub>) of 4-(chloromethyl)thiobenzene derivative. The spectrum shows peaks corresponding to the chemical structure, with the following chemical shifts (ppm) labeled:

- 158.52
- 156.86
- 134.33
- 133.73
- 131.73
- 131.68
- 131.08
- 131.01
- 129.06
- 127.43
- 121.51
- 117.95
- 117.09
- 116.95
- 77.00 (CDCl<sub>3</sub>)
- 41.69

**Figure S28:**  $^{13}\text{C}$ -NMR ( $\text{CDCl}_3$ ) spectrum of 2-chloro-1-fluoro-4-[[[(phenylsulfanyl)methyl]sulfanyl]benzene (**4d**)

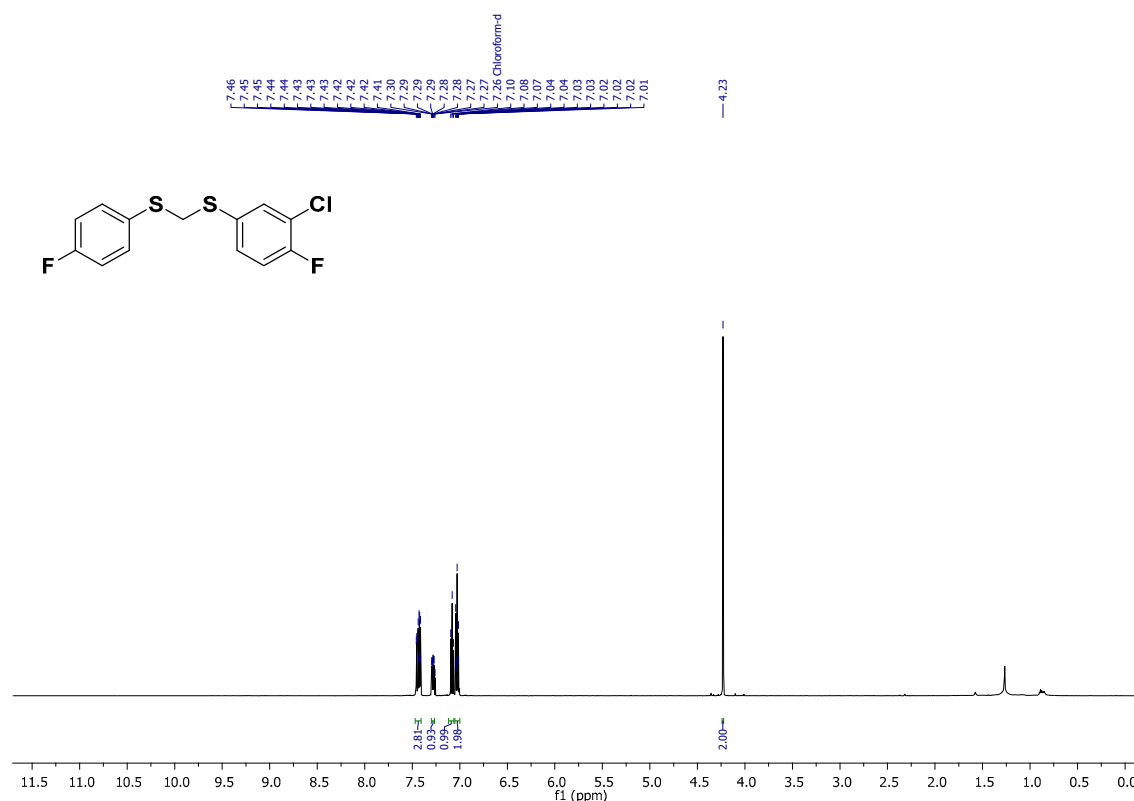

**Figure S29:**  $^1\text{H}$ -NMR ( $\text{CDCl}_3$ ) spectrum of 2-chloro-1-fluoro-4-(([(4-fluorophenyl)sulfanyl)methyl]sulfanyl) benzene (**4e**)

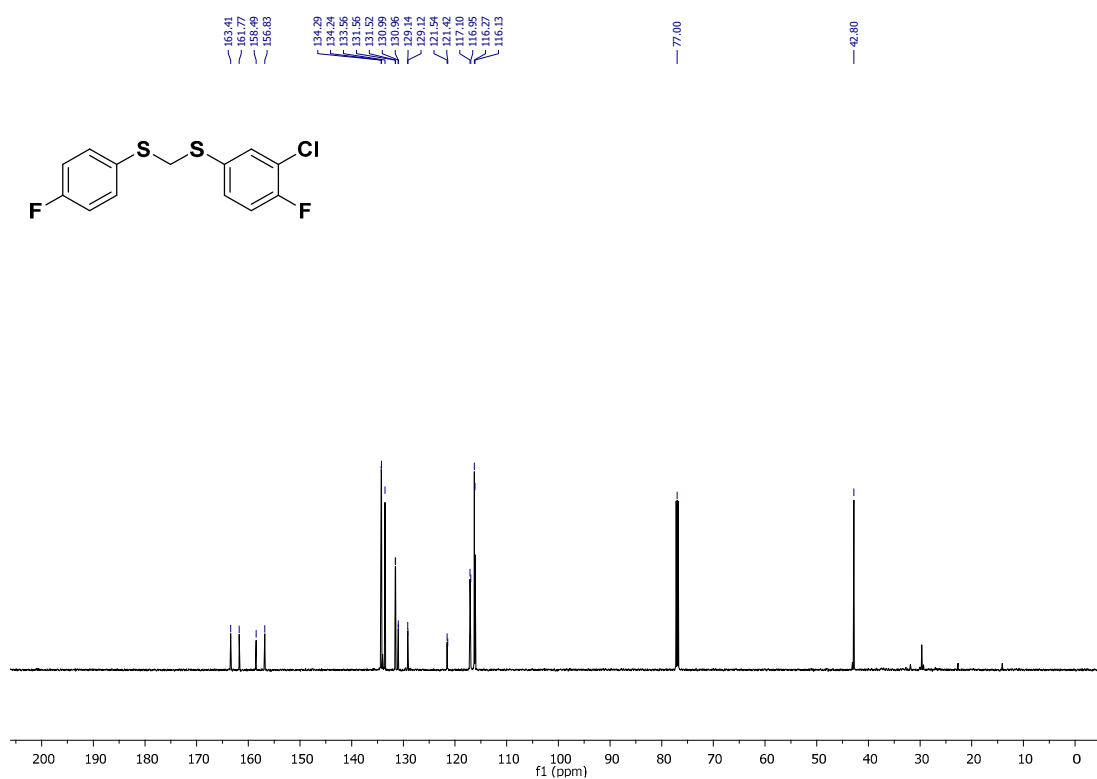

**Figure S30:** <sup>13</sup>C-NMR (CDCl<sub>3</sub>) spectrum of 2-chloro-1-fluoro-4-(((4-fluorophenyl)sulfanyl)methyl)sulfanyl) benzene (**4e**)

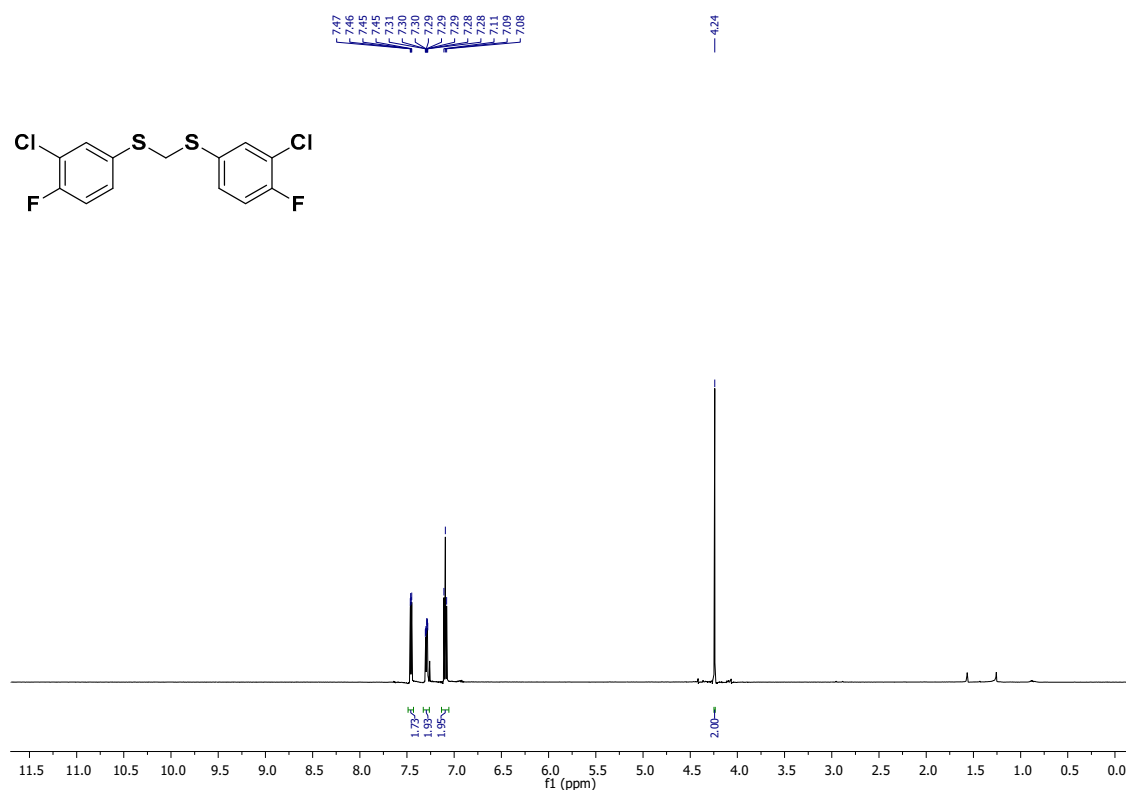

**Figure S31:** <sup>1</sup>H-NMR (CDCl<sub>3</sub>) spectrum of 2-chloro-4-[(3-chloro-4-fluorophenyl)sulfanylmethylsulfanyl]-1-fluorobenzene (**4f**)

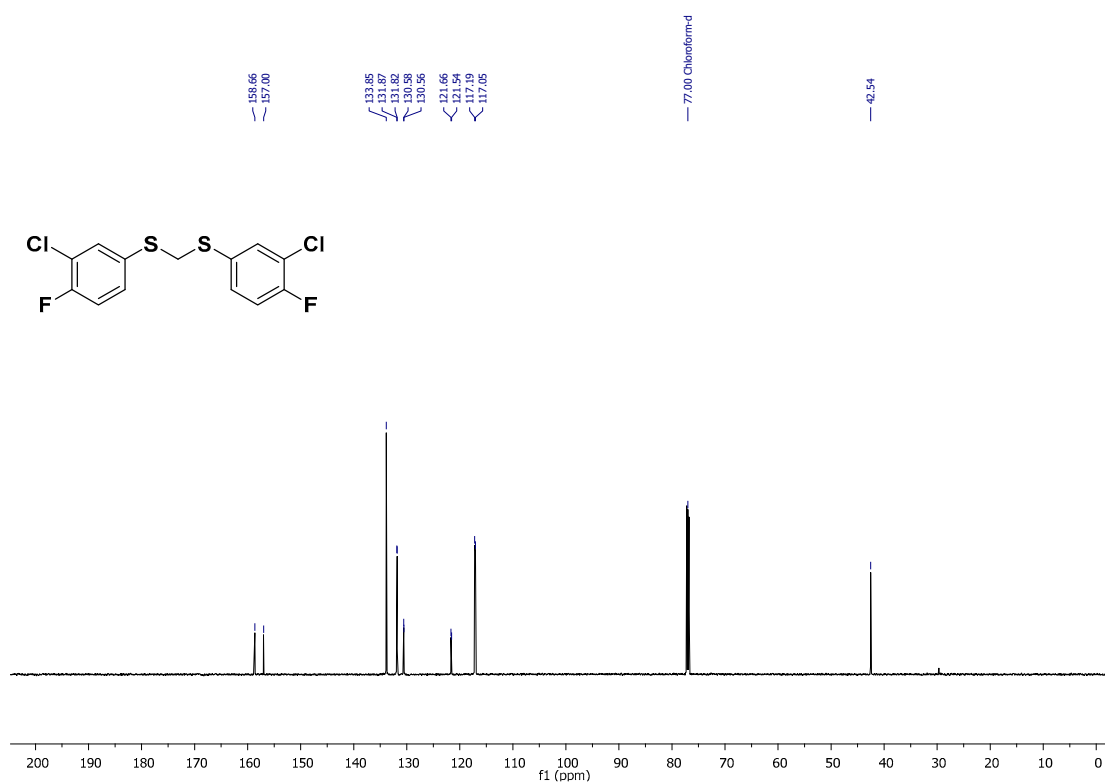

**Figure S32:** <sup>13</sup>C-NMR (CDCl<sub>3</sub>) spectrum of 2-chloro-4-[(3-chloro-4-fluorophenyl)sulfanylmethylsulfanyl]-1-fluorobenzene (**4f**)

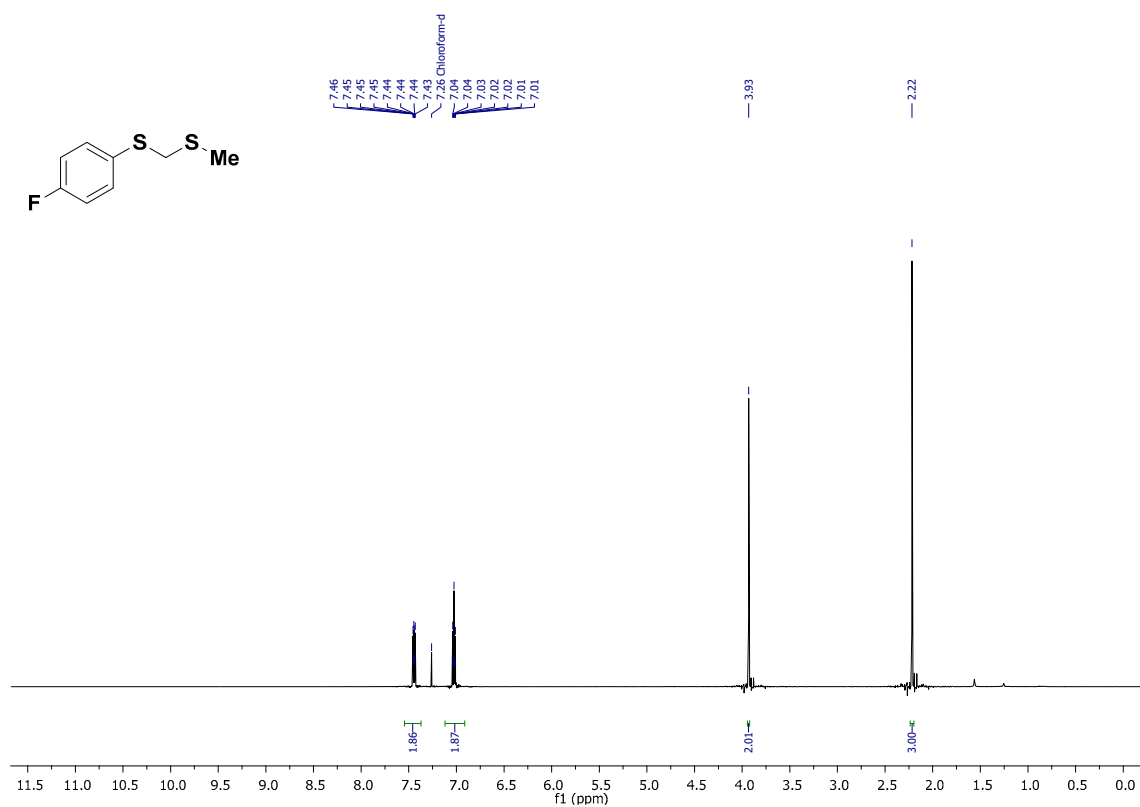

**Figure S33:**  $^1\text{H}$ -NMR ( $\text{CDCl}_3$ ) spectrum of 1-fluoro-4-[[[(methylsulfanyl)methyl]sulfanyl]benzene (4g)

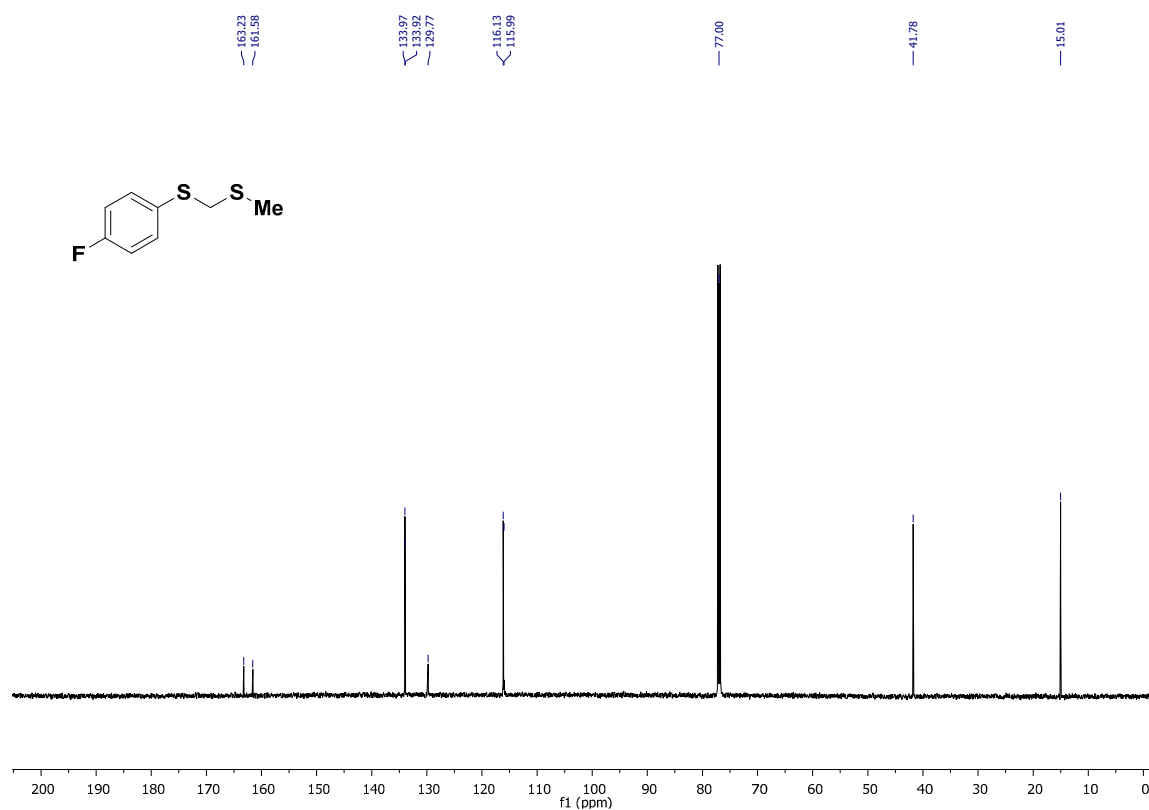

**Figure S34:**  $^{13}\text{C}$ -NMR ( $\text{CDCl}_3$ ) spectrum of 1-fluoro-4-[[[(methylsulfanyl)methyl]sulfanyl]benzene (4g)

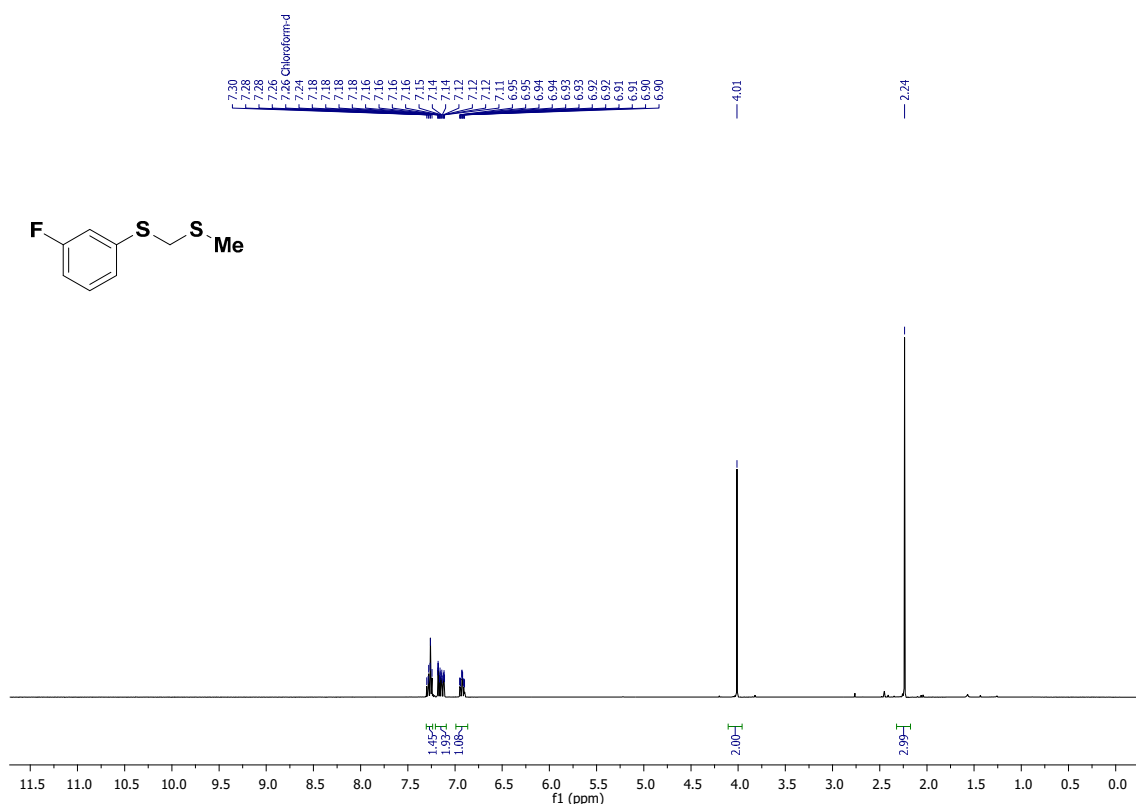

**Figure S35:** <sup>1</sup>H-NMR (CDCl<sub>3</sub>) spectrum of 1-fluoro-3-[(methylsulfanyl)methyl]sulfany]benzene (4h)

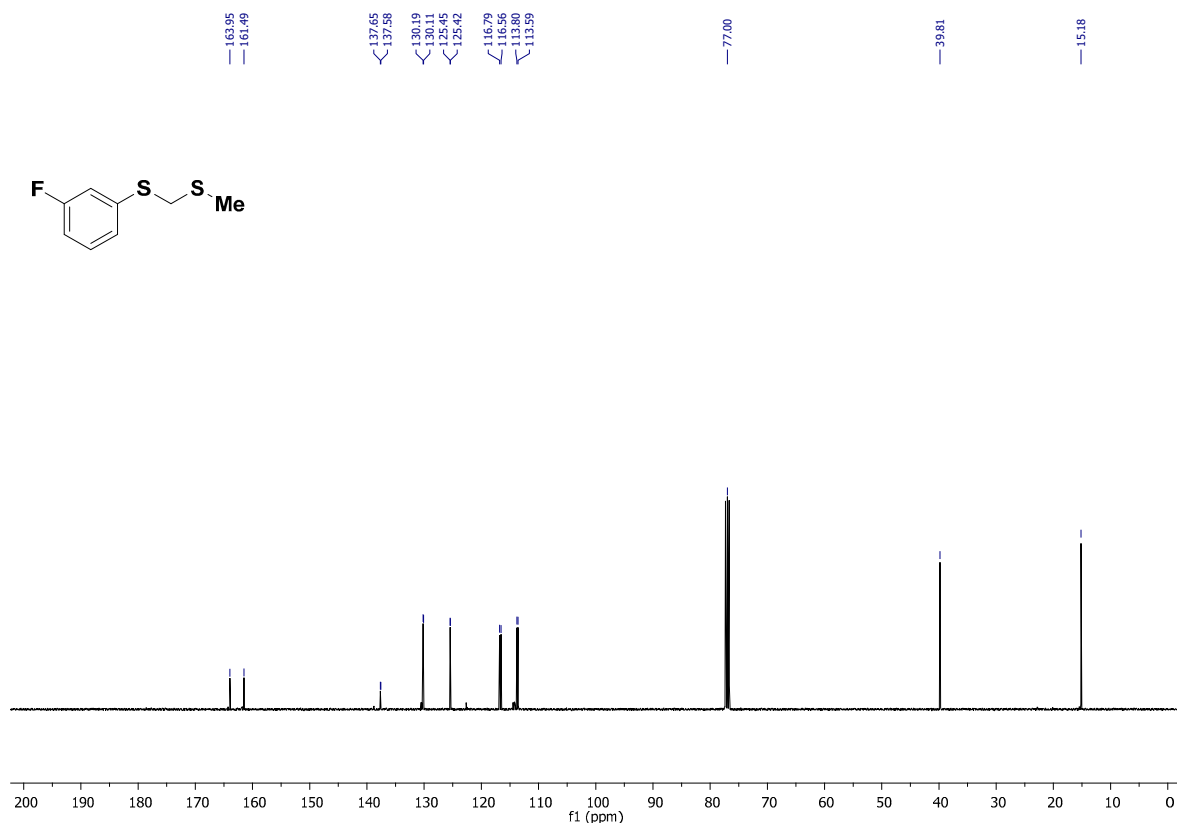

**Figure S36:**  $^{13}\text{C}$ -NMR ( $\text{CDCl}_3$ ) spectrum of 1-fluoro-3-[[[(methylsulfonyl)methyl]sulfonyl]benzene (4h)

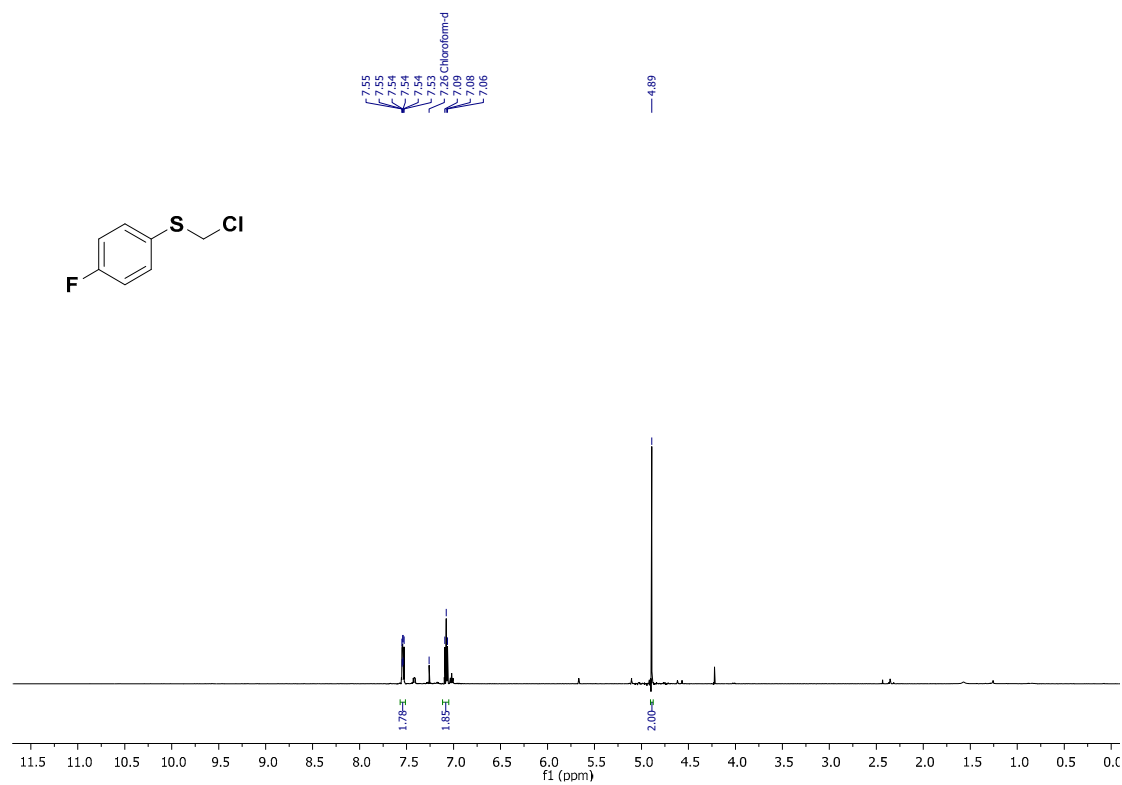

**Figure S37:**  $^1\text{H}$ -NMR ( $\text{CDCl}_3$ ) spectrum of 1-[(chloromethyl)sulfonyl]-4-fluorobenzene (14c)



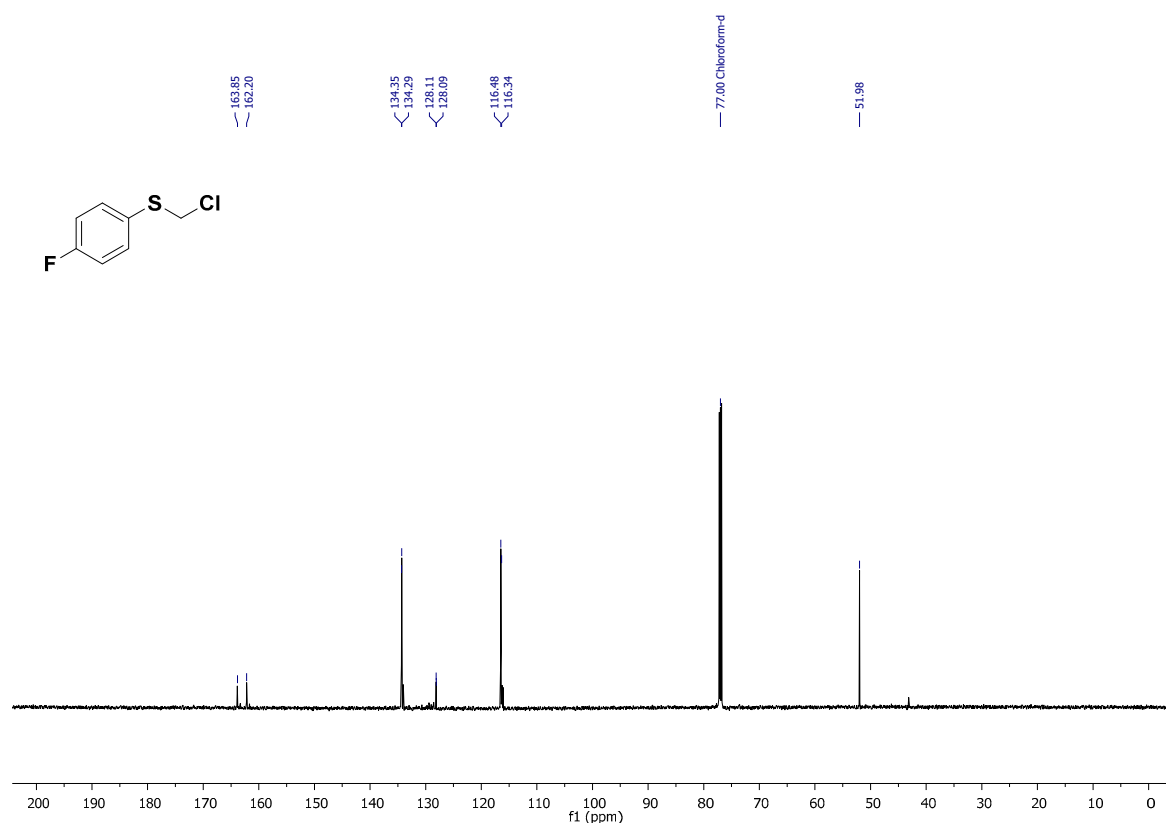

**Figure S38:**  $^{13}\text{C}$ -NMR (CDCl<sub>3</sub>) spectrum of 1-[(chloromethyl)sulfanyl]-4-fluorobenzene (**14c**)
